# Supplementary material for: CTCF binding landscape in jawless fish with reference to Hox cluster evolution
Source: PubMed Central journal article supplement (PMC5504073; doi:10.1038/s41598-017-04506-x), 2017-07-10
Supplement: 41598_2017_4506_MOESM1_ESM.pdf [file 41598_2017_4506_MOESM1_ESM.pdf]

# Supplementary Information

## CTCF binding landscape in jawless fish with reference to Hox cluster evolution

Mitsutaka Kadota<sup>1</sup>, Yuichiro Hara<sup>1</sup>, Kaori Tanaka<sup>1</sup>, Wataru Takagi<sup>2</sup>, Chiharu Tanegashima<sup>1</sup>, Osamu Nishimura<sup>1</sup> & Shigehiro Kuraku<sup>1</sup>

<sup>1</sup>Phyloinformatics Unit, RIKEN Center for Life Science Technologies, 2-2-3 Minatojima-minami, Chuo-ku, Kobe, 650-0047, Japan.

<sup>2</sup>Evolutionary Morphology Laboratory, RIKEN, 2-2-3 Minatojima-minami, Chuo-ku, Kobe, 650-0047, Japan.

Yuichiro Hara, Kaori Tanaka and Wataru Takagi contributed equally to this work. Correspondence and requests for materials should be addressed to S.K. (email: shigehiro.kuraku@riken.jp)

## Materials and Methods

**cDNA Cloning and Sanger Sequencing.** For *LjCTCF*, cDNA was synthesized from total RNA extracted from pooled stage 27 embryos, using SuperScript III Reverse Transcriptase (Thermo Fisher Scientific) and a gene specific primer. RT-PCR was performed to amplify cDNA containing the full-length ORF of approximately 3.7 Kbp using KAPA HiFi HotStart ReadyMix (KAPA Biosystems) and 1 M Betaine (Sigma) in the reaction. The PCR product was ligated into the pCR4Blunt-TOPO vector (Thermo Fisher Scientific) and sequenced on a 3730xl DNA Analyzer (Thermo Fisher Scientific).

For *LjCTCF2*, 3'RACE was performed using total RNA extracted from pooled stage 25 embryos, with 3' RACE kit (Thermo Fisher Scientific) and gene specific primers. Total RNA extracted from pooled stage 25 embryos was reverse transcribed into cDNA, with ThermoScript Reverse Transcriptase (Thermo Fisher Scientific) and a primer specific to *LjCTCF2*. RT-PCR was performed to amplify cDNA containing the putative full-length ORF of approximately 1.3 Kbp using Phusion High-Fidelity DNA Polymerase (NEB) and the supplied GC buffer. PCR products were A-tailed using Taq HS Perfect Mix (Takara Bio), ligated into the pCRII-TOPO vector (Thermo Fisher Scientific) and sequenced as above. Oligonucleotide primers used here are included in Supplementary Table S7.

**Western Blotting, Immunoprecipitation and Mass Spectrometry.** Frozen tissues and embryos were powderized using SK-200 mill (Tokken) and lysed in RIPA buffer containing 1 % protease inhibitor solution (Sigma, P8340) and 1 mM DTT.

For western blotting, 20-30  $\mu$ g of total proteins were electrophoresed, transferred to a nitrocellulose membrane using iBlot (Thermo Fisher Scientific) for Fig. 2a left, and a PVDF membrane by wet electroblotting method for Fig. 2a right, and blocked with 5 % skim milk. Antigen was detected by incubating the membranes at 4 °C in TBST buffer using either anti-CTCF antibody (CST #3418S, 1:2000 dilution), anti- $\beta$ -actin antibody (CST #5125, 1:2000 dilution), or anti-histone H3 antibody (Wako #304-34781, 1:2000 dilution). HRP-conjugated anti-rabbit IgG secondary antibody or HRP-conjugated anti-mouse IgG secondary antibody (1:2000 dilution) was used to detect the primary antibodies by the ECL system (GE Healthcare Life Science).

Immunoprecipitation was carried out using 1-3 mg of protein lysate and 10  $\mu$ l of anti-CTCF antibody in RIPA buffer at 4 °C for 4 hours under gentle rotation. Following the addition of Protein A beads (Thermo Fisher Scientific), the reaction mixture was incubated for another 1 hour with rotation at 4 °C. Beads were washed with RIPA buffer three times, and proteins were eluted and denatured by boiling the beads in SDS sample buffer for 5 minutes. Following electrophoresis, proteins were stained with silver staining kit (Wako). Gel bands were excised and analyzed by mass spectrometry (LC-MS/MS) as described previously<sup>1</sup>.

**Gene Prediction and Curation.** Previous genome analysis on *L. camtschaticum* did not provide gene annotation to be readily used in RNA-seq and ChIP-seq data analysis<sup>2</sup>. For this reason, we performed gene prediction and its evidence-based improvement as follows (see Supplementary Fig. S1, for a flow chart of this entire procedure). First, the program BUSCO v1<sup>3</sup> was ran on the *L. camtschaticum* genome assembly LetJap1.0, referring to the metazoan gene set (mBUSCO), which resulted in 535 mBUSCO component genes identified on the genomic scaffold sequences that were longer than 100 Kbp. To increase sequence-level heterogeneity among them, we ran blastclust<sup>4</sup> with options ‘-L 0.1 -S 20’. In order for individual genes to represent distinct genomic regions with their flanking non-coding sequences, we discarded one of the neighboring gene pairs that are located with an intergenic sequence shorter than 3 Kbp. 450 genes that remained after these selections were used in a training of the gene prediction program AUGUSTUS v3.1<sup>5</sup>, according to the developer’s instruction (<http://bioinf.uni-greifswald.de/augustus/binaries/tutorial/training.html>). Second, in order to improve the accuracy of identification of exon-boundaries later by AUGUSTUS, we aligned RNA-seq reads to the genome assembly (LetJap1.0) using TopHat2 v2.0.11<sup>6</sup> and Bowtie2 v2.2.2<sup>7</sup> with the default setting without providing any gene model, and constructed ‘intron hints’ according to the developer’s instruction (<http://bioinf.uni-greifswald.de/bioinf/wiki/pmwiki.php?n=IncorporatingRNAseq.Tophat>) (see Supplementary Table S1 for mapping rates). In addition, in order to generate ‘CDSpart hints’ based on homologs of other species, a set of vertebrate protein sequences were used as queries in TBLASTN with a threshold of 1e-10, followed by exact identification of protein-coding regions with exon-intron boundaries taken into account using Exonerate v2.2.0<sup>8</sup>. The vertebrate protein sequence set consisted of RefSeq ‘known’ proteins of human (39,582 sequences), chicken (6,189 sequences), and amniote vertebrates (44,675 sequences), as well as predicted sea lamprey genes (24, 271 sequences<sup>9</sup>). Third, the LetJap1.0 genome assembly was subjected to identification of conventional and *de novo* repetitive sequences with RepeatModeler v1.0.4<sup>10</sup> with default parameters, followed by masking of the identified repetitive sequences with RepeatMasker v4.0.5<sup>11</sup> with the options ‘-nolow -xsmall’. Fourth, the program AUGUSTUS was run with the trained parameter files on the genome assembly in which the identified repeats are soft-masked, incorporating intron hints and CDSpart hints with the options ‘--singlestrand=false --alternatives-from-evidence=false --allow\_hinted\_splicesites=atac --softmasking=1’.

These predicted genes were then further improved by making use of transcriptional evidence from RNA-seq, as well as sequence similarity to the aforementioned vertebrate protein sequence set. The RNA-seq reads were used to build a transcriptome assembly via mapping-first and assembly-first approaches. In the mapping-first approach, RNA-seq reads were first aligned to the Arctic lamprey genome assembly with Tophat2 v2.0.11. This alignment data was used in combination with the AUGUSTUS predicted gene model to generate a transcriptome assembly by Cufflinks v2.2.1<sup>12</sup>. In the assembly-first approach, the same RNA-seq reads were utilized by Trinity r20140413p1<sup>13</sup> to produce *de novo* transcriptome assemblies, which were aligned to the Arctic lamprey genome with

PASA v2.0.2<sup>14</sup>. The coding regions of the assembled transcripts from both approaches were deduced using Transdecoder v2.0.1<sup>15</sup>, which employed homology matches to the UniProtKB/Swiss-Prot release 2014\_07 peptides. Once this was completed, the transcripts with putative ORFs were collected, and their deduced amino acid sequences were compared against their best-hit match to the vertebrate proteins. From this comparison, a protein-coding transcript evidence set, consisting of the assembled transcripts which had at least 80% of their length matching to at least 80% of a RefSeq protein, was obtained.

The transcript evidence set was aligned back against the AUGUSTUS predicted genes. From this analysis, certain AUGUSTUS genes, depending on how they lined up against the transcript evidence, were placed into one of four different categories, (i) split genes, (ii) fusion genes, (iii) truncated genes, and (iv) unannotated genes (see Supplementary Fig. S1b). (i) A split gene had the putative ORF of the transcript evidence overlapping with more than two AUGUSTUS genes; if these AUGUSTUS genes matched to different parts of the same vertebrate protein, they were replaced by the exons composing the transcript evidence. (ii) A fusion gene occurred when multiple vertebrate protein-genome alignments, which were generated with Exonerate as described above, overlapped with different parts of a single AUGUSTUS gene; if at least 60% of the individual protein-genome alignments uniquely overlapped with at least 60% of the transcript evidence in different AUGUSTUS gene positions, the AUGUSTUS gene was replaced by the exons of the overlapping transcript evidence. (iii) A truncated gene was specified as an AUGUSTUS gene that was entirely overlapped by a coding sequence in the transcript evidence; the AUGUSTUS gene was replaced with the exons composing the transcript evidence if its match to the vertebrate protein was longer than the AUGUSTUS gene's match to the vertebrate protein. (iv) An unannotated gene was a case where at least 60% of a vertebrate protein aligned to a region of the genome in which no genes were predicted by AUGUSTUS; if a coding region in the transcript evidence overlapped with the vertebrate protein, the exons composing the transcript evidence was added to the gene set. In each of these cases, similarity searches of the amino acid sequences of both the AUGUSTUS genes and the assembled transcripts against the vertebrate proteins were performed using FASTA v36.3.8b<sup>16</sup>, with the numbers of replaced genes in each category shown in Supplementary Table S2. As a result, a total of 34,435 genes were identified. The completeness of the gene set assessed by BUSCO increased by 1 after the procedure for correcting mispredictions outlined above (Supplementary Table S2). The produced gene model is available at our laboratory web site (<http://www2.clst.riken.jp/phylo/GRAS-LJ.gff3.gz>).

**Gene Expression Quantification using RNA-seq Data.** Gene expression quantification was performed by mapping RNA-seq reads to nucleotide coding sequences of the genes predicted as above, except that incompletely predicted *LjCTCF* and *LjCTCF2* sequences were replaced with their exonic nucleotide sequences containing their full ORFs that we confirmed with cDNA cloning. Using these sequences as reference, read mapping was performed with Bowtie2 v2.2.2 with '--very-

sensitive-local' option followed by FPKM calculation by eXpress v1.5.1<sup>17</sup>. See Supplementary Table S1 for mapping rates.

**ChIP-seq Data Analysis.** ChIP-seq data for mouse E14.5 embryonic brain (SRR392354 and SRR505014), E14.5 MEF (SRR207080 and SRR207071), and ES cells (SRR207089 and SRR207081) were obtained from NCBI SRA. ChIP-seq data for adult dog liver (ERR022285, ERR022304) and adult opossum liver (ERR022303, ERR022307, ERR022306, and ERR022301) were obtained from EBI ENA. ChIP-seq data for fly *Drosophila melanogaster* (SRR066831-SRR066836), was obtained from NCBI SRA. ChIP-seq reads were processed by Trim Galore! v0.3.7 ([http://www.bioinformatics.babraham.ac.uk/projects/trim\\_galore/](http://www.bioinformatics.babraham.ac.uk/projects/trim_galore/)) with default parameters except for the opossum data. ChIP-seq reads for mouse, dog, opossum, and fly were mapped to mm10, CanFam3.1, MonDom5, and Dmel r6.11 genome assemblies using Bowtie v0.12.8<sup>18</sup>, respectively. For mouse and fly data, only uniquely mapped reads were obtained using the options '-m 1 -n 2 -a --best --strata'. For dog and opossum data, uniquely mapped reads were first obtained using the options '-m 1 -v 2 -a --best --strata'. Subsequently, unmapped reads were mapped using the options '-m 5 -n 2 -a --best --strata', allowing each read to align with up to five locations, and combined with the uniquely mapped reads. Peak calling was performed using MACS2 v2.0.10<sup>19</sup> with its default parameters. Identification of the CTCF 'core' and 'upstream' motifs was performed for mouse, dog, and opossum as described in Materials and Methods, using sequences from the top 2000 peak regions. Only the 'core motif' was identified in the top 500 peak regions for the fly. The location and orientation of CTCF motifs within peak regions inside Hox clusters were identified by FIMO v4.10.1<sup>20</sup> as described in Materials and Methods.

**Protein Identification by Chromatography-coupled Tandem Mass Spectrometry (LC-MS/MS).** Proteins from gel slices were subjected to reduction/alkylation, followed by digestion with 10 µg/ml trypsin at 37 °C for 16 hours. Peptides were extracted with 5 % formic acid and 50 % acetonitrile, dried, and dissolved in 2 % acetonitrile and 0.1 % formic acid. Peptides were fractionated by reverse-phase chromatography (ADVANCE UHPLC) and applied to ion trap mass spectrometer (LTQ Orbitrap Velos Pro; ThermoFisher) with advanced captive spray source. The Mascot software (Matrix Science) was used to identify the match of molecular masses to non-redundant protein from the NCBI database (ver. 20151116), while for *L. camtschaticum*, peptides were searched against the gene set predicted by AUGUSTUS from the *L. camtschaticum* genome (LetJap1.0) containing the CTCF protein sequences determined in this study.

**Chromatin Immunoprecipitation Protocol.** Chromatin immunoprecipitation was performed basically as described<sup>21</sup> but with modifications to adapt to embryos and tissues of the Arctic lamprey

*L. camtschaticum* and chicken.

**Step-1: Sample Preparation.** Lamprey embryos were collected and pooled at stage 27. The lamprey liver tissue was obtained from an adult female after induced insemination. Chicken embryos were sampled at stage 25. Tissue and embryo samples were snap frozen in liquid nitrogen after dissection and stored at  $-80^{\circ}\text{C}$ . The GM12878 cell line was cultured in RPMI-1640 medium (Gibco, 21870-076) supplemented with 15 % heat inactivated FBS (Gibco, 10082-139),  $1\times$  L-glutamine (Gibco, 25030081) and  $1\times$  Antibiotic-antimycotic solution (Gibco, 15240-096), at  $37^{\circ}\text{C}$  under 5 %  $\text{CO}_2$ .

**Step-2: Cell Fixation.** The SK-200 frost mill with metal tubes and bullets was used to manually powderize 100 mg of lamprey liver tissue, 100 mg of pooled lamprey embryos, and a whole chicken embryo. The pulverized samples were transferred to frozen 2.0 ml tubes and dissolved in 1.5 ml PBS (-) supplemented with 1 % formaldehyde (Pierce, 28906). Fixation was performed for 15 minutes at room temperature with gentle agitation. Approximately  $1\times 10^8$  GM12878 cells were fixed in 10 ml of 1 % formaldehyde solution for 5 minutes at room temperature with gentle agitation. Glycine was added to a final concentration of 0.125 M in order to quench the crosslinking reaction. Samples were centrifuged, and washed twice with cold PBS (-).

**Step-3: Lysate Preparation.** Fixed samples were resuspended in either 1 ml (for the liver tissue and embryos) or 10 ml (for GM12878 cells) of chilled LB1 buffer [50 mM Hepes-KOH, pH 7.5, 140 mM NaCl, 1 mM EDTA, 10 % (w/v) Glycerol, 0.5 % (w/v) NP-40, 0.25 % (w/v) TritonX-100, 0.1% protease inhibitor (SIGMA, P8340)], and incubated at  $4^{\circ}\text{C}$  for 10 minutes with gentle agitation. Tissue and embryo samples were subjected to 10~20 strokes of dounce homogenization on ice with the tissue grinder set pestle B (Sigma, D8938). After centrifugation, cells were washed once in either 1 ml (for the liver tissue and embryos) or 10 ml (for GM12878 cells) of chilled LB2 buffer [1 mM Tris-HCl pH 8.0, 200 mM NaCl, 1 mM EDTA, 0.5 mM EGTA, 0.1% protease inhibitor (SIGMA, P8340)], followed by 3 additional washes in 1 ml of chilled LB3 buffer [50 mM Tris-HCl pH8.0, 1 % SDS, 10 mM EDTA, 1% protease inhibitor (SIGMA, P8340)]. Tissue and embryo samples were resuspended in 130, 260, or 390  $\mu\text{l}$  of LB3 buffer, depending on the amount of cells used. GM12878 cells were resuspended in 1 ml of LB3 buffer. Chromatin lysates were prepared by sonication in Covaris S220 or E220 (COVARIS). Tissue and embryo chromatin lysates were prepared at PIP 140, 5 % duty cycle, 200 cycles per burst,  $7^{\circ}\text{C}$  bath temperature, and 16-minute duration in 130  $\mu\text{l}$ /microTUBE. Chromatin lysate of GM12878 cells was prepared at PIP 140, 10 % duty cycle, 200 cycles per burst,  $7^{\circ}\text{C}$  bath temperature, and 20-minute duration in 1 ml/milliTUBE. Debris was removed by centrifugation at  $20,000\times g$  for 5 minutes at  $4^{\circ}\text{C}$ . Lysates in the supernatant were snap frozen in liquid nitrogen and kept at  $-80^{\circ}\text{C}$  for later use.

**Step-4: Assessment of Chromatin DNA Fragmentation.** To assess the degree of chromatin DNA fragmentation, 10  $\mu\text{l}$  of lysates were diluted in 200  $\mu\text{l}$  of Elution buffer (10 mM Tris-HCl pH8.0, 300 mM NaCl, 5 mM EDTA, 1 % SDS) and incubated at  $65^{\circ}\text{C}$  for more than 6 hours to reverse the crosslinking. Samples were further treated with 10  $\mu\text{g}$  of RNase A for 20 minutes at

37 °C, and with 100 µg of Proteinase K for 40 minutes at 55 °C. Samples were transferred to 1.5 ml DNA LoBind tubes (Eppendorf, 0030108051), mixed and vortexed with 200 µl of Phenol:Chloroform:Isoamyl Alcohol solution (25:24:1, v/v) and centrifuged at 20,000 ×g for 5 minutes at room temperature. Subsequently, about 180 µl of the aqueous phase was transferred to a new DNA LoBind tube, after which 200 µl of TE buffer (containing 300 mM NaCl) was added to the remaining organic phase. The aqueous phase extraction was repeated, and about 200 µl of the 2<sup>nd</sup> aqueous phase was combined with the first aqueous phase. Ethanol precipitation was carried out by adding 20 µg of glycogen and 900 µl of ice cold 100 % ethanol. DNA was precipitated by centrifugation at 20,000 ×g for 30 minutes at 4 °C. The DNA pellet was washed once in 1 ml of 75 % ethanol, and centrifuged again at 20,000 ×g for 5 minutes at 4 °C to remove all traces of ethanol. The DNA pellet was air dried for 2 minutes at room temperature with the tube lid open, and dissolved in 50 µl of TE solution. DNA Concentration was measured using Qubit dsDNA HS Assay kit (Thermo Fisher Scientific, Q32851), and size distribution was measured using Agilent High Sensitivity DNA kit (Agilent Technologies, 5067-4626). Chromatin fragmentation was considered optimal if 1) more than 80 % of DNA fragments were within ranges of 100-500 bp, and 2) the average size of DNA fragments were between 200-300 bp. Concentrations of lysates in terms of cell numbers were estimated from the total amount of input DNA obtained from 10 µl of each of the chromatin lysates, using factors of 6 pg DNA, 2 pg DNA, and 3 pg DNA per cell for human, chicken and lamprey, respectively.

**Step-5: IP Reaction.** Chromatin immunoprecipitation (ChIP) was performed using lysates equivalent to  $1 \times 10^7$  cells. Chromatin lysates were diluted 10 folds in ChIP dilution buffer (16.7 mM Tris-HCl (pH8.0), 0.01 % SDS, 1.1 % (w/v) TritonX-100, 1.2 mM EDTA, 167 mM NaCl, 0.1% protease inhibitor) containing 0.5 mg/ml BSA (for lamprey liver and GM12878 cells) or 4 mg/ml BSA (for lamprey and chicken embryos). Protein A beads (Novex, 10002D) were coupled with 5 µl of anti-CTCF antibody (CST, #3418 S) in ChIP dilution buffer for 1 hour at 4 °C. Antibody-coupled beads were washed once with ChIP dilution buffer containing 0.5 mg/ml BSA, added to the diluted lysate, and incubated for 4 hours at 4 °C under gentle agitation. After the IP reaction, beads were washed 4 times in low salt buffer (20mM Tris-HCl (pH 8.0), 0.1 % SDS, 1% (w/v) TritonX-100, 2mM EDTA, 150 mM NaCl), and twice in high salt buffer (20 mM Tris-HCl (pH8.0), 0.1 % SDS, 1 % (w/v) TritonX-100, 2mM EDTA, 500 mM NaCl). The immune complexes were eluted from the beads by agitation in elution buffer (10 mM Tris-HCl (pH8.0), 300 mM NaCl, 5 mM EDTA, 1 % SDS) at room temperature for 15 minutes, and supernatants were transferred to a new tube and incubated overnight at 65 °C for reverse-crosslinking. Eluates were further treated with RNase A and Protease K, and they were precipitated in ethanol to obtain ChIP DNA, as described for the input DNA.

**Step-6: ChIP DNA QC.** Prior to library preparation, enrichment of the CTCF bound regions in the ChIP DNA was analyzed by quantitative qPCR using primers designed for human *H19*, *HoxA6* and *Gapdh* loci, for chicken *HoxB8*, *HoxD8*, and *Actb* loci, and for lamprey *Hox-α5*, *Hox-α6* and *Actb*

loci. CTCF binding sites in human were identified by analyzing ChIP-seq datasets from a public database, while for chicken and lamprey, CTCF binding sites were predicted using the database JASPAR 2014 (<http://jaspar.genereg.net/>). Enrichment folds were calculated as the ratio between “quantitated concentrations by qPCR” and “actual DNA concentration”. Samples that displayed enrichment greater than 10 fold were used for library preparation.

**Step-7: Library Preparation and Library QC.** Libraries were prepared from 20-30 ng input DNA or 1-5 ng ChIP DNA using KAPA LTP Library Preparation Kit (KAPA Biosystems, KK8232) with TruSeq index adaptors. We modified the manufacturer’s protocol and carried out reaction at 1/5 scale. The amount of PEG/NaCl solution used for reaction clean-ups were 4× up to the adaptor ligation step, and 1.3× after the adaptor ligation step. Size selection of DNA was carried out after the end repair reaction by AMPure XP beads (Beckman Coulter, A63881). The library preparation procedure in brief was as follows. End repair reaction was carried out in 14 µl volume at 20 °C for 30 minutes. Prior to size selection, the volume was increased to 30 µl by adding 16 µl of TE buffer. Amounts of AMPure XP beads used were 0.7× (21 µl) to remove DNA  $\geq 400$  bp, and additional 3.3× (99 µl) to collect DNA  $\geq 50$  bp, resulting in selecting DNA between sizes of 50 bp and 400 bp. A-tailing reaction was carried out in 10 µl volume at 30 °C for 30 minutes. Adaptor ligation reaction was carried out in 10 µl volume with 10 pmol TruSeq adaptor (for the input samples), or with 1 pmol TruSeq adaptor (for the ChIP samples) at 20 °C for 15 minutes. The ligation product was purified by adding 1.3× amount (13 µl) of PEG/NaCl solution to the reaction, and eluted in 25 µl of Tris-HCl buffer (pH 8.0), followed by another round of purification by adding 1.3× amount (32.4 µl) of PEG/NaCl solution and elution in 11 µl of Tris-HCl buffer (pH 8.0). In order to determine the optimal PCR cycle for the library amplification, qPCR was carried out using KAPA Real-Time Library Amplification Kit (KAPA Biosystems, KK2701) in 10 µl reaction volume with 1.5 µl of the adaptor ligated DNA. 10 µl each of the fluorescence standards 1-4 were used as controls. Threshold PCR cycle that reached the intensity of the fluorescence standard 1 was determined to be the optimal cycle number for library amplification in each sample. Once the PCR cycle was determined, library was amplified in 20 µl reaction volume using KAPA HiFi HotStart ReadyMix (KAPA Biosystems, KK2601) and 8.5 µl of the adaptor ligated DNA. PCR products were purified by adding 1.3× amount (26 µl) of AMPure XP beads to the reaction, and eluted in 20 µl of Tris-HCl buffer (pH 8.0). In order to confirm the quality and quantity of the prepared libraries, their concentration and size distribution were analyzed with Qubit dsDNA HS Assay kit and Agilent High Sensitivity DNA kit. Library qPCR was also carried out to calculate the enrichment folds at positive and negative control regions, using equal amounts of input and ChIP library DNA as templates in the reaction. Enrichment folds were calculated as the ratio of quantified concentrations of “ChIP libraries” and “input libraries”. Libraries that displayed enrichment greater than 10 fold at positive control regions were used for sequencing in Illumina HiSeq1500.



**a**

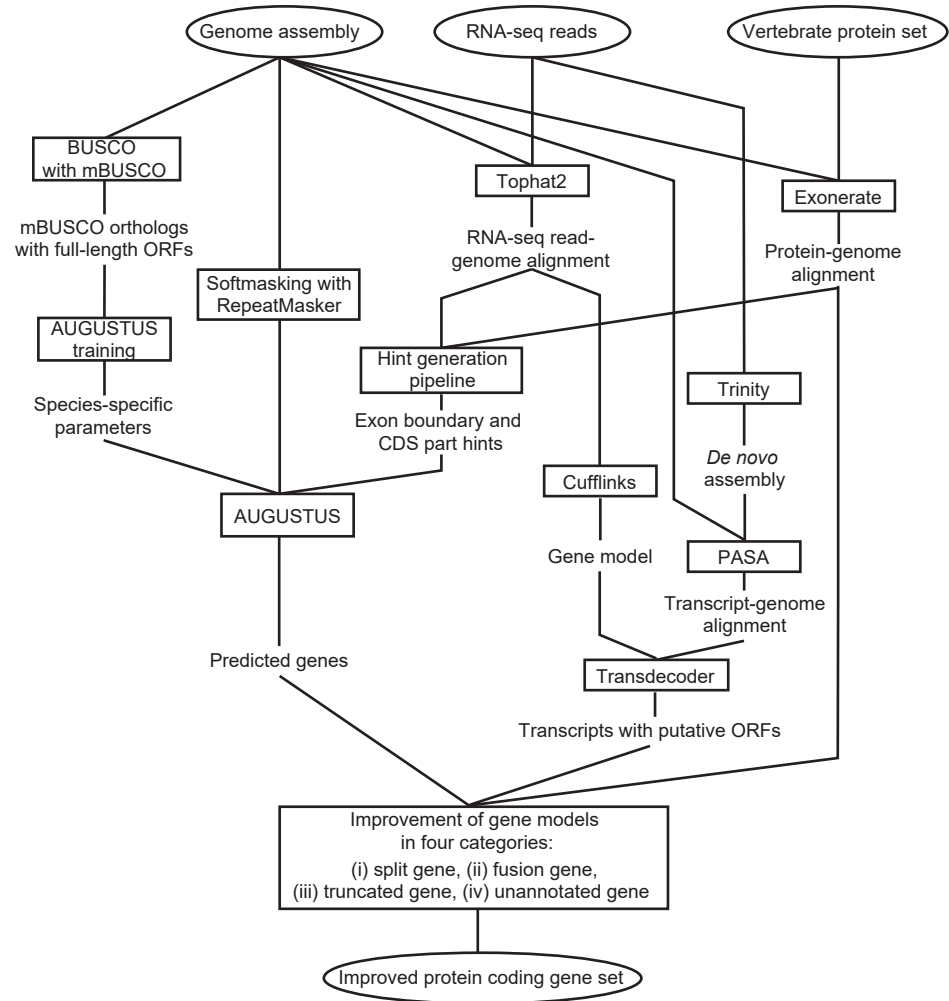

**b**

(i) split gene

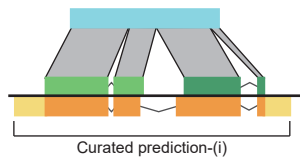

(ii) fusion gene

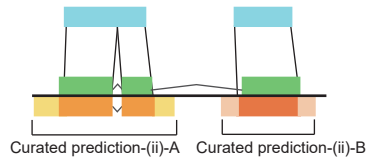

(iii) truncated gene

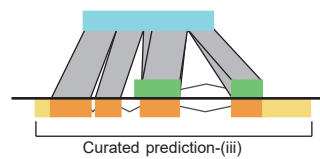

(iv) unannotated gene

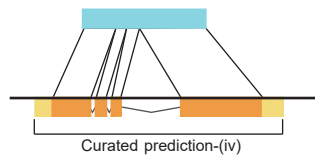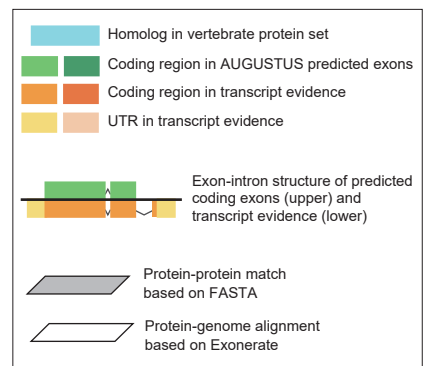

**Fig. S1.** Gene prediction on the *L. camtschaticum* genome assembly. **(a)** A flowchart of gene prediction procedure. Rectangles represent procedures or executed programs. Plain descriptions denote intermediate products. **(b)** Curation of AUGUSTUS prediction with transcript evidence. The four different categories i)-iv) in **(a)**, with variable modes of sequence alignment and overlap at genomic position between predicted gene model, transcript evidence, genome assembly, and vertebrate homologs, are schematically shown.





**Fig. S2.** Alignment of vertebrate CTCF peptide sequences by MAFFT program. Alignments were performed by MAFFT program (v7.293, <http://mafft.cbrc.jp/alignment/software/>) by iterative refinement method (L-INS-i). **(a)** Alignment of LjCTCF and vertebrate CTCF peptides. **(b)** Alignment of cyclostome CTCF and CTCF2 peptides. Red boxes indicate conserved Zn finger (ZF) domains inferred by MOTIF Search program (<http://www.genome.jp/tools/motif/>) that matched Pfam and PROSITE patterns.

a. +OG-Pep-ML, 208 sites

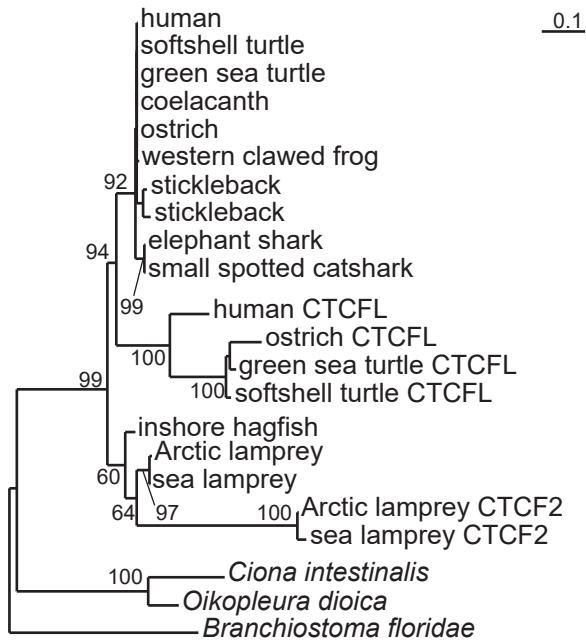

b. +OG-Pep-Bayesian, 208 sites

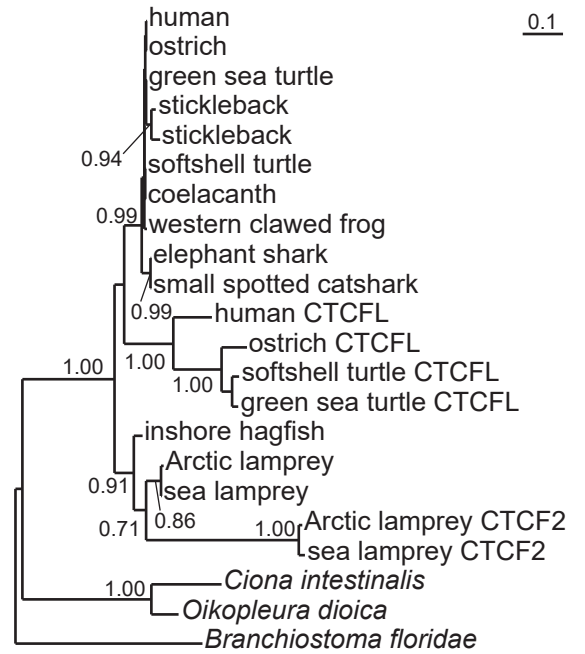

c. +OG-1st2nd-ML, 416 sites

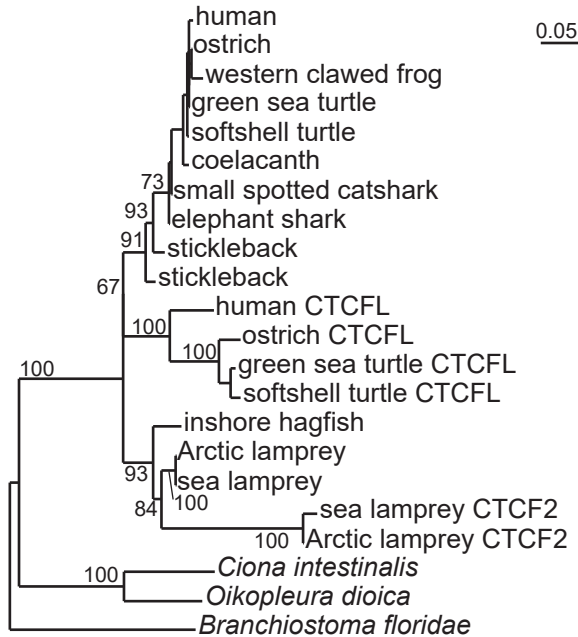

d. +OG-1st2nd-Bayesian, 416 sites

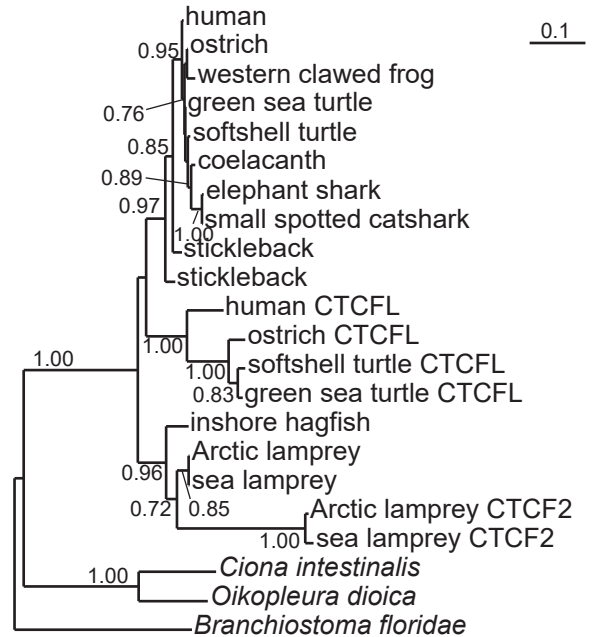

e. +OG-CDS-ML, 624 sites

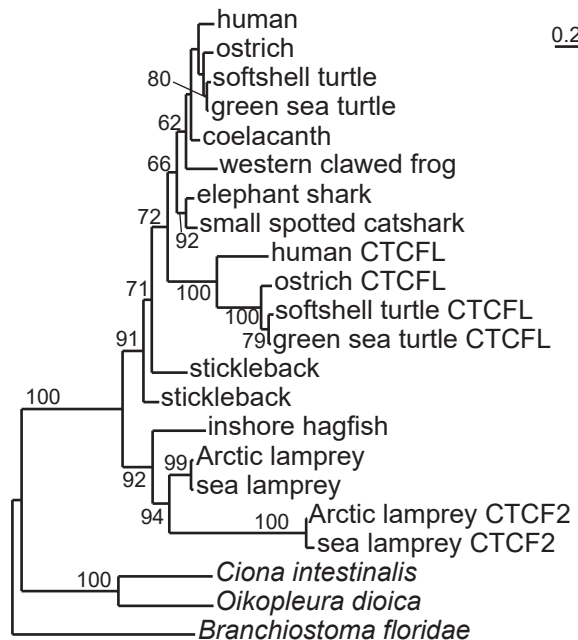

f. +OG-CDS-Bayesian, 624 sites

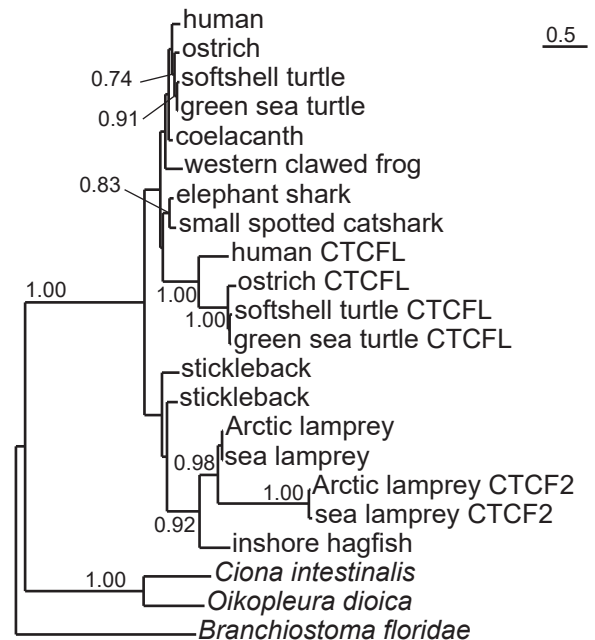

g. -OG-Pep-ML, 249 sites

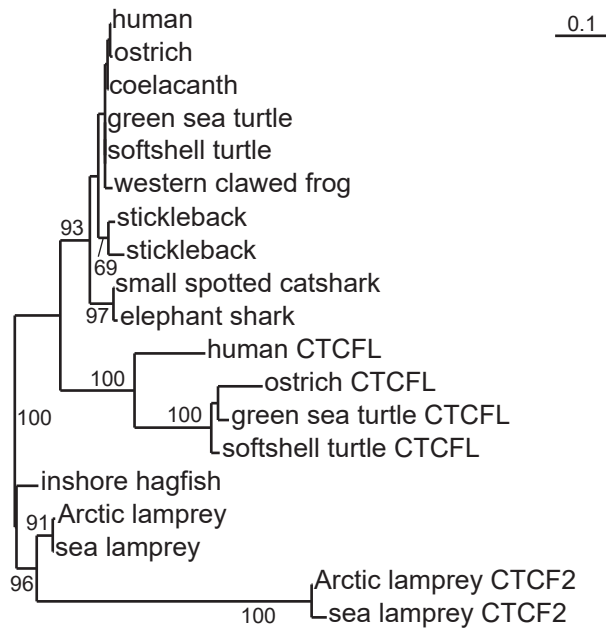

h. -OG-Pep-Bayesian, 249 sites

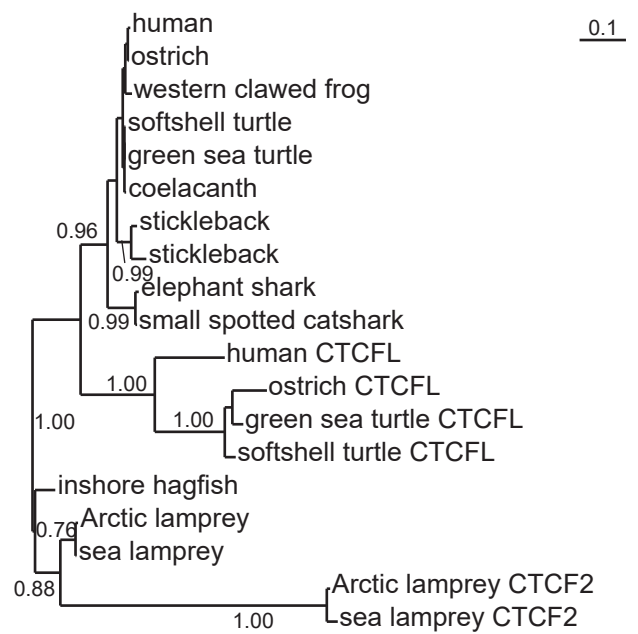

i. -OG-1st2nd-ML, 498 sites

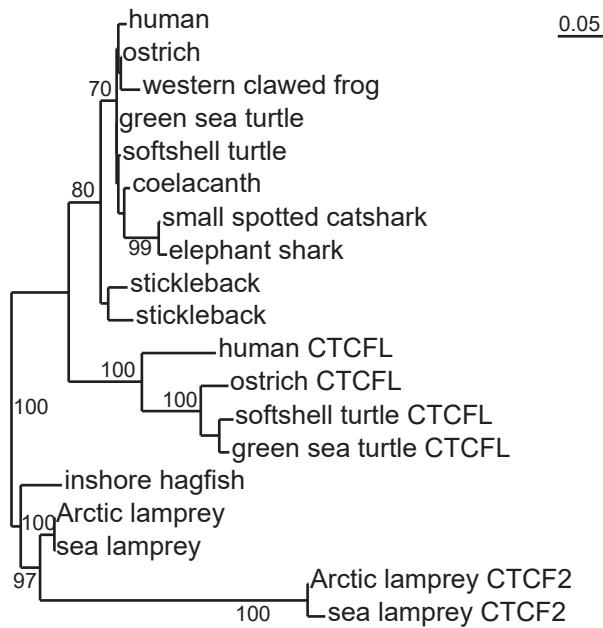

j. -OG-1st2nd-Bayesian, 498 sites

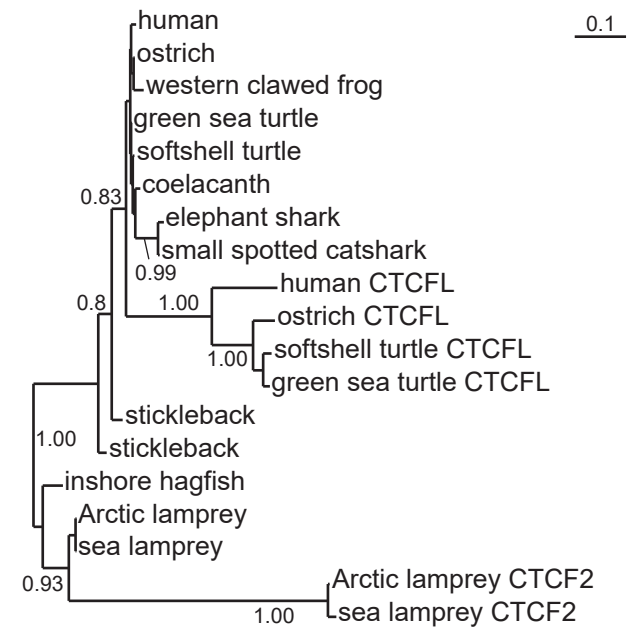

k. -OG-CDS-ML, 747 sites

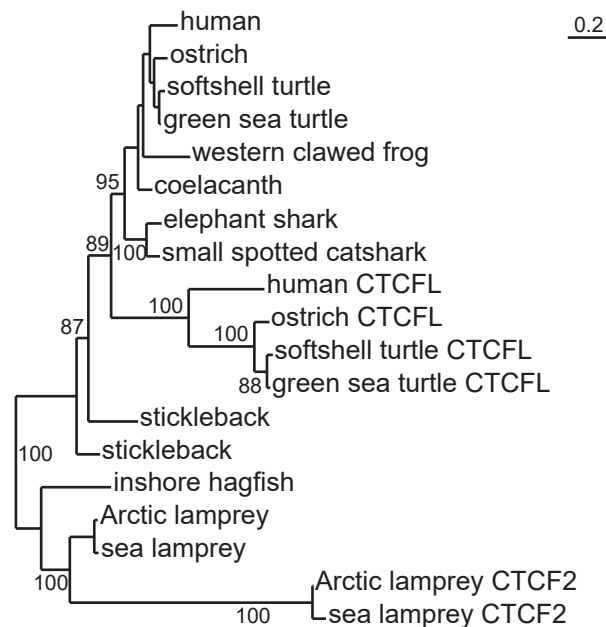

l. -OG-CDS-Bayesian, 747 sites

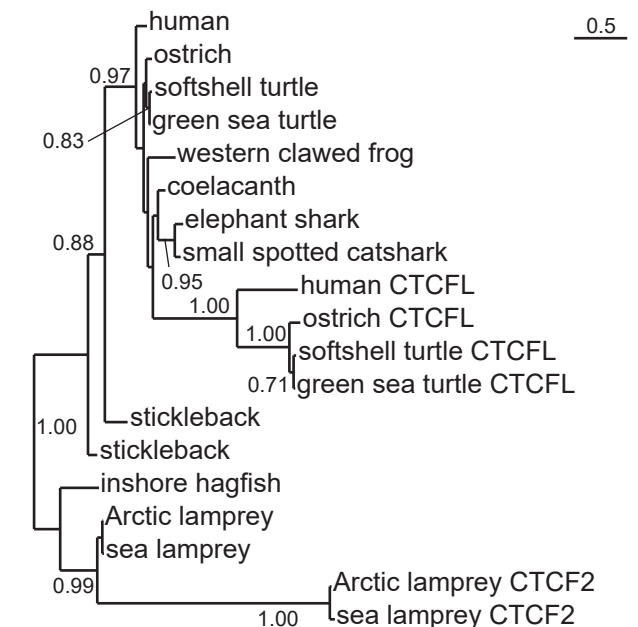

**Fig. S3.** CTCF molecular phylogeny inferred with variable methods and datasets. Each of the trees were inferred with a combination of the three conditions, namely 1) inclusion/exclusion of an outgroup (+OG or -OG), 2) type of input sequences [amino acids (Pep), the first and second codon positions (1st2nd), or entire coding regions (CDS)], and 3) choice of the tree inference method (ML or Bayesian). **(a)** Phylogenetic tree with an outgroup inferred using the amino acid sequences with the ML approach (designated '+OG-Pep-ML' using the abbreviations above). The conditions of the other trees are abbreviated as follows: **(b)** -OG-Pep-Bayesian; **(c)** +OG-1st2nd-ML; **(d)** +OG-1st2nd-Bayesian; **(e)** +OG-CDS-ML; **(f)** +OG-CDS-Bayesian; **(g)** -OG-Pep-ML; **(h)** -OG-Pep-Bayesian; **(i)** -OG-1st2nd-ML; **(j)** -OG-1st2nd-Bayesian; **(k)** -OG-CDS-ML; **(l)** -OG-CDS-Bayesian. Two stickleback sequences for duplicated genes are included (upper, Ensembl ENSGACP00000003270; lower, ENSGACP00000020939). For ML tree inference, the PROTCATWAG and CATGTR models were employed for amino acid and nucleotide sequences, respectively, and for Bayesian tree inference, the CAT-WAG- $\Gamma$  and CAT-GTR- $\Gamma$  models were employed. Bootstrap values of 60 or greater and posterior probabilities of 0.7 or greater were shown at the branch nodes of the ML and Bayesian trees, respectively.



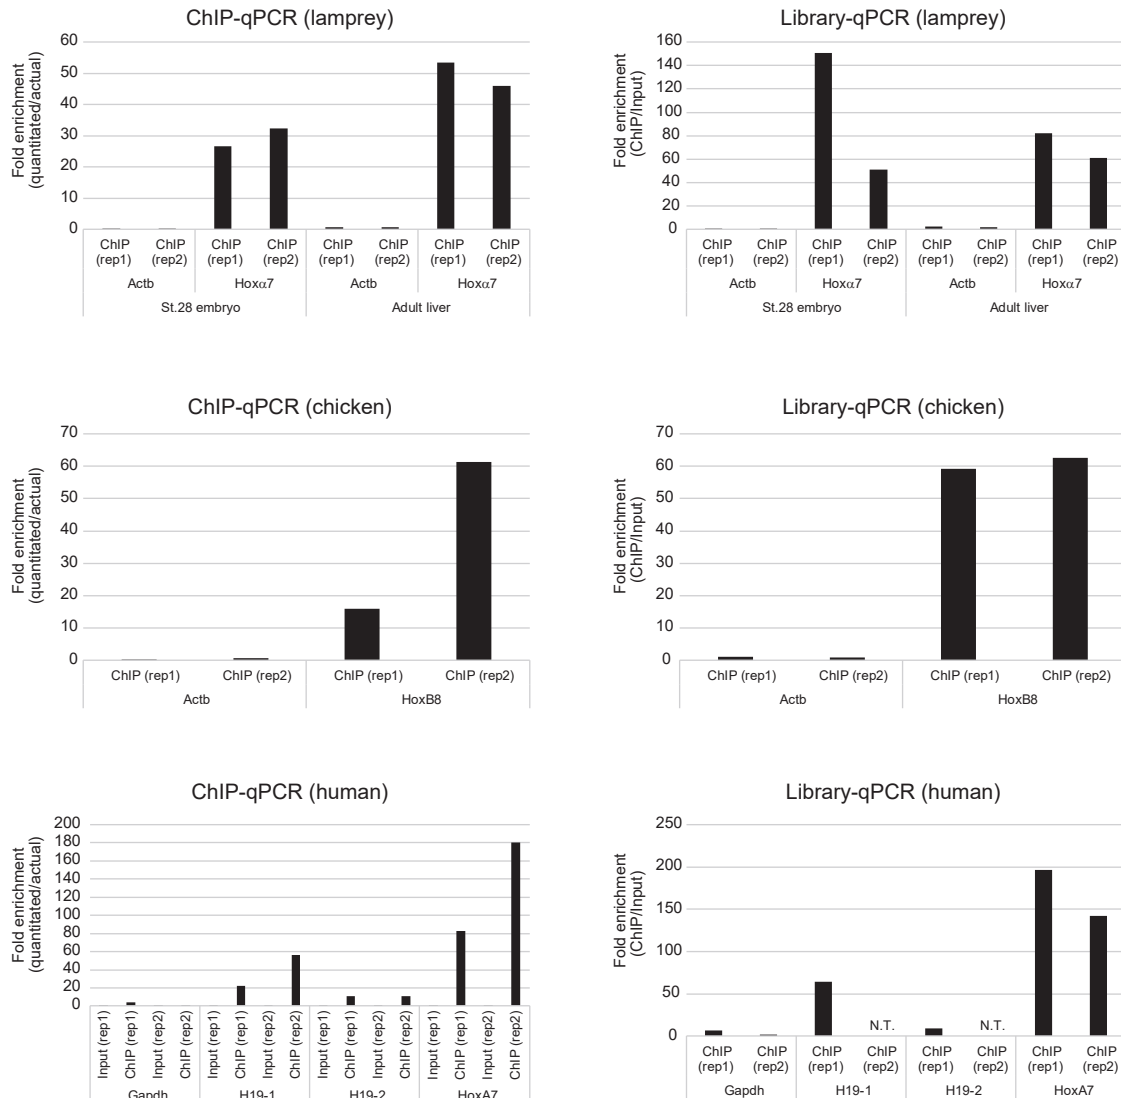

**Fig. S4.** Enrichment analysis of CTCF bound regions. qPCR was performed using QuantiTect SYBR Green PCR kit (Qiagen) with primers described in Supplementary Table S7. Template DNAs used for qPCR were input and ChIP DNAs for the ChIP-qPCR experiment (on the left), or the input and ChIP DNA libraries for the library-qPCR experiment (on the right). For ChIP-qPCR, enrichment folds were calculated as the ratio between the “qPCR-quantitated concentration” and “actual DNA concentration”. For library-qPCR, equal amounts of template DNAs were used for the qPCR reaction, and enrichment folds were calculated as the ratio of quantitated values of “ChIP library” and “input library”. ChIP libraries were confirmed to display no less than 10 folds of enrichment in at least one positive control region before sequencing.



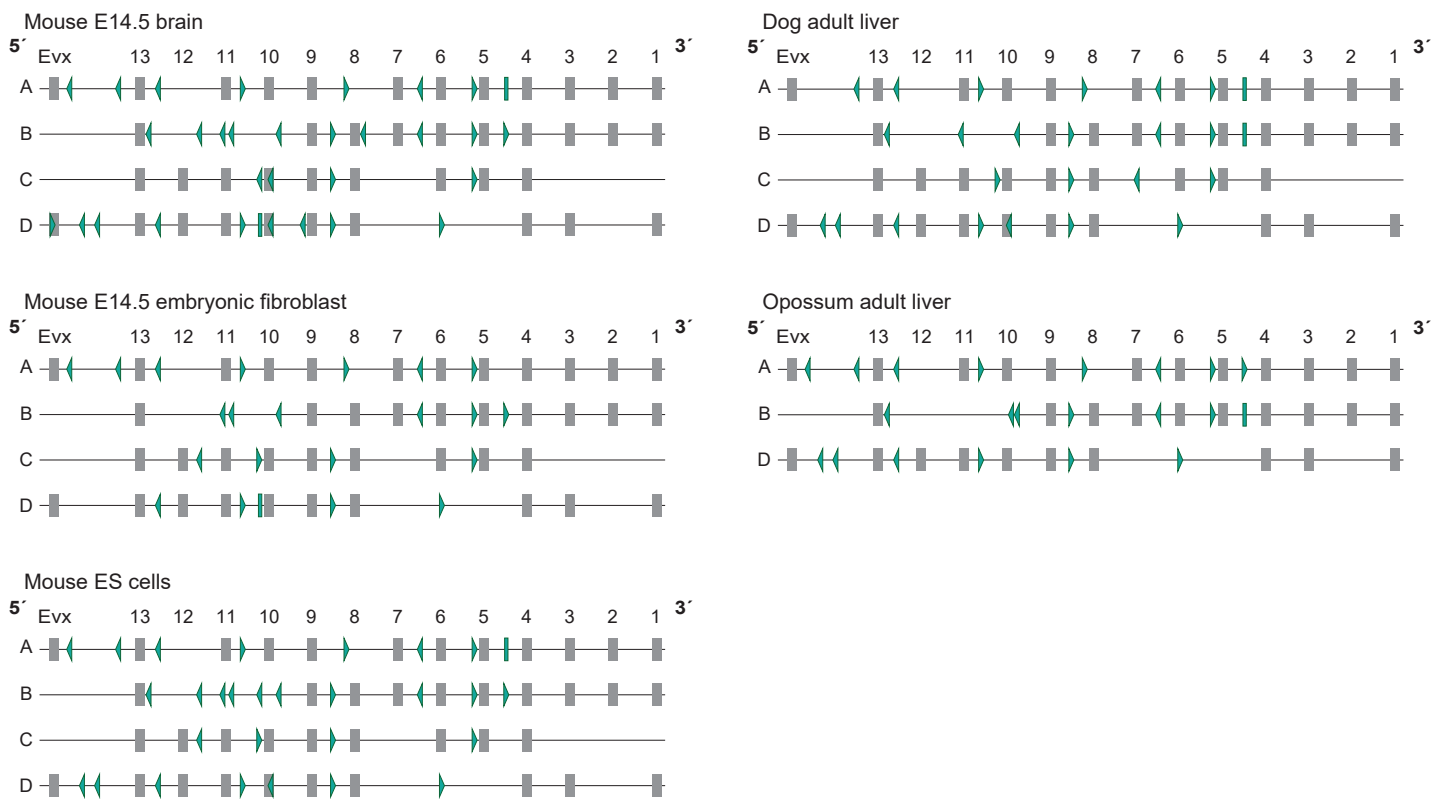

**Fig. S6.** Distribution of CTCF binding sites at Hox clusters of mouse E14.5 embryonic tissues (brain and MEF), mouse ES cells, adult dog liver, and adult opossum liver. ChIP-seq data were obtained from NCBI SRA (SRR392354, SRR505014, SRR207080, SRR207071, SRR207089, and SRR207081) and EBI ENA (ERR022285, ERR022304, ERR022303, ERR022307, ERR022306, and ERR022301) and processed as described in Supplementary Materials and Methods. Coding regions of genes are indicated with gray boxes. CTCF binding sites are indicated with green arrowheads and bars. Arrowheads indicate the orientations of core motifs inferred by the FIMO program. Bars indicate CTCF binding sites without a core motif. ChIP-seq peaks with enrichments of no less than 10 fold (for mouse and dog), or 5 fold (for opossum) are shown. Note that Hox C genes were not identified as a cluster in the opossum genome assembly MonDom5.

**a** Lamprey (st.27 embryo, adult liver)

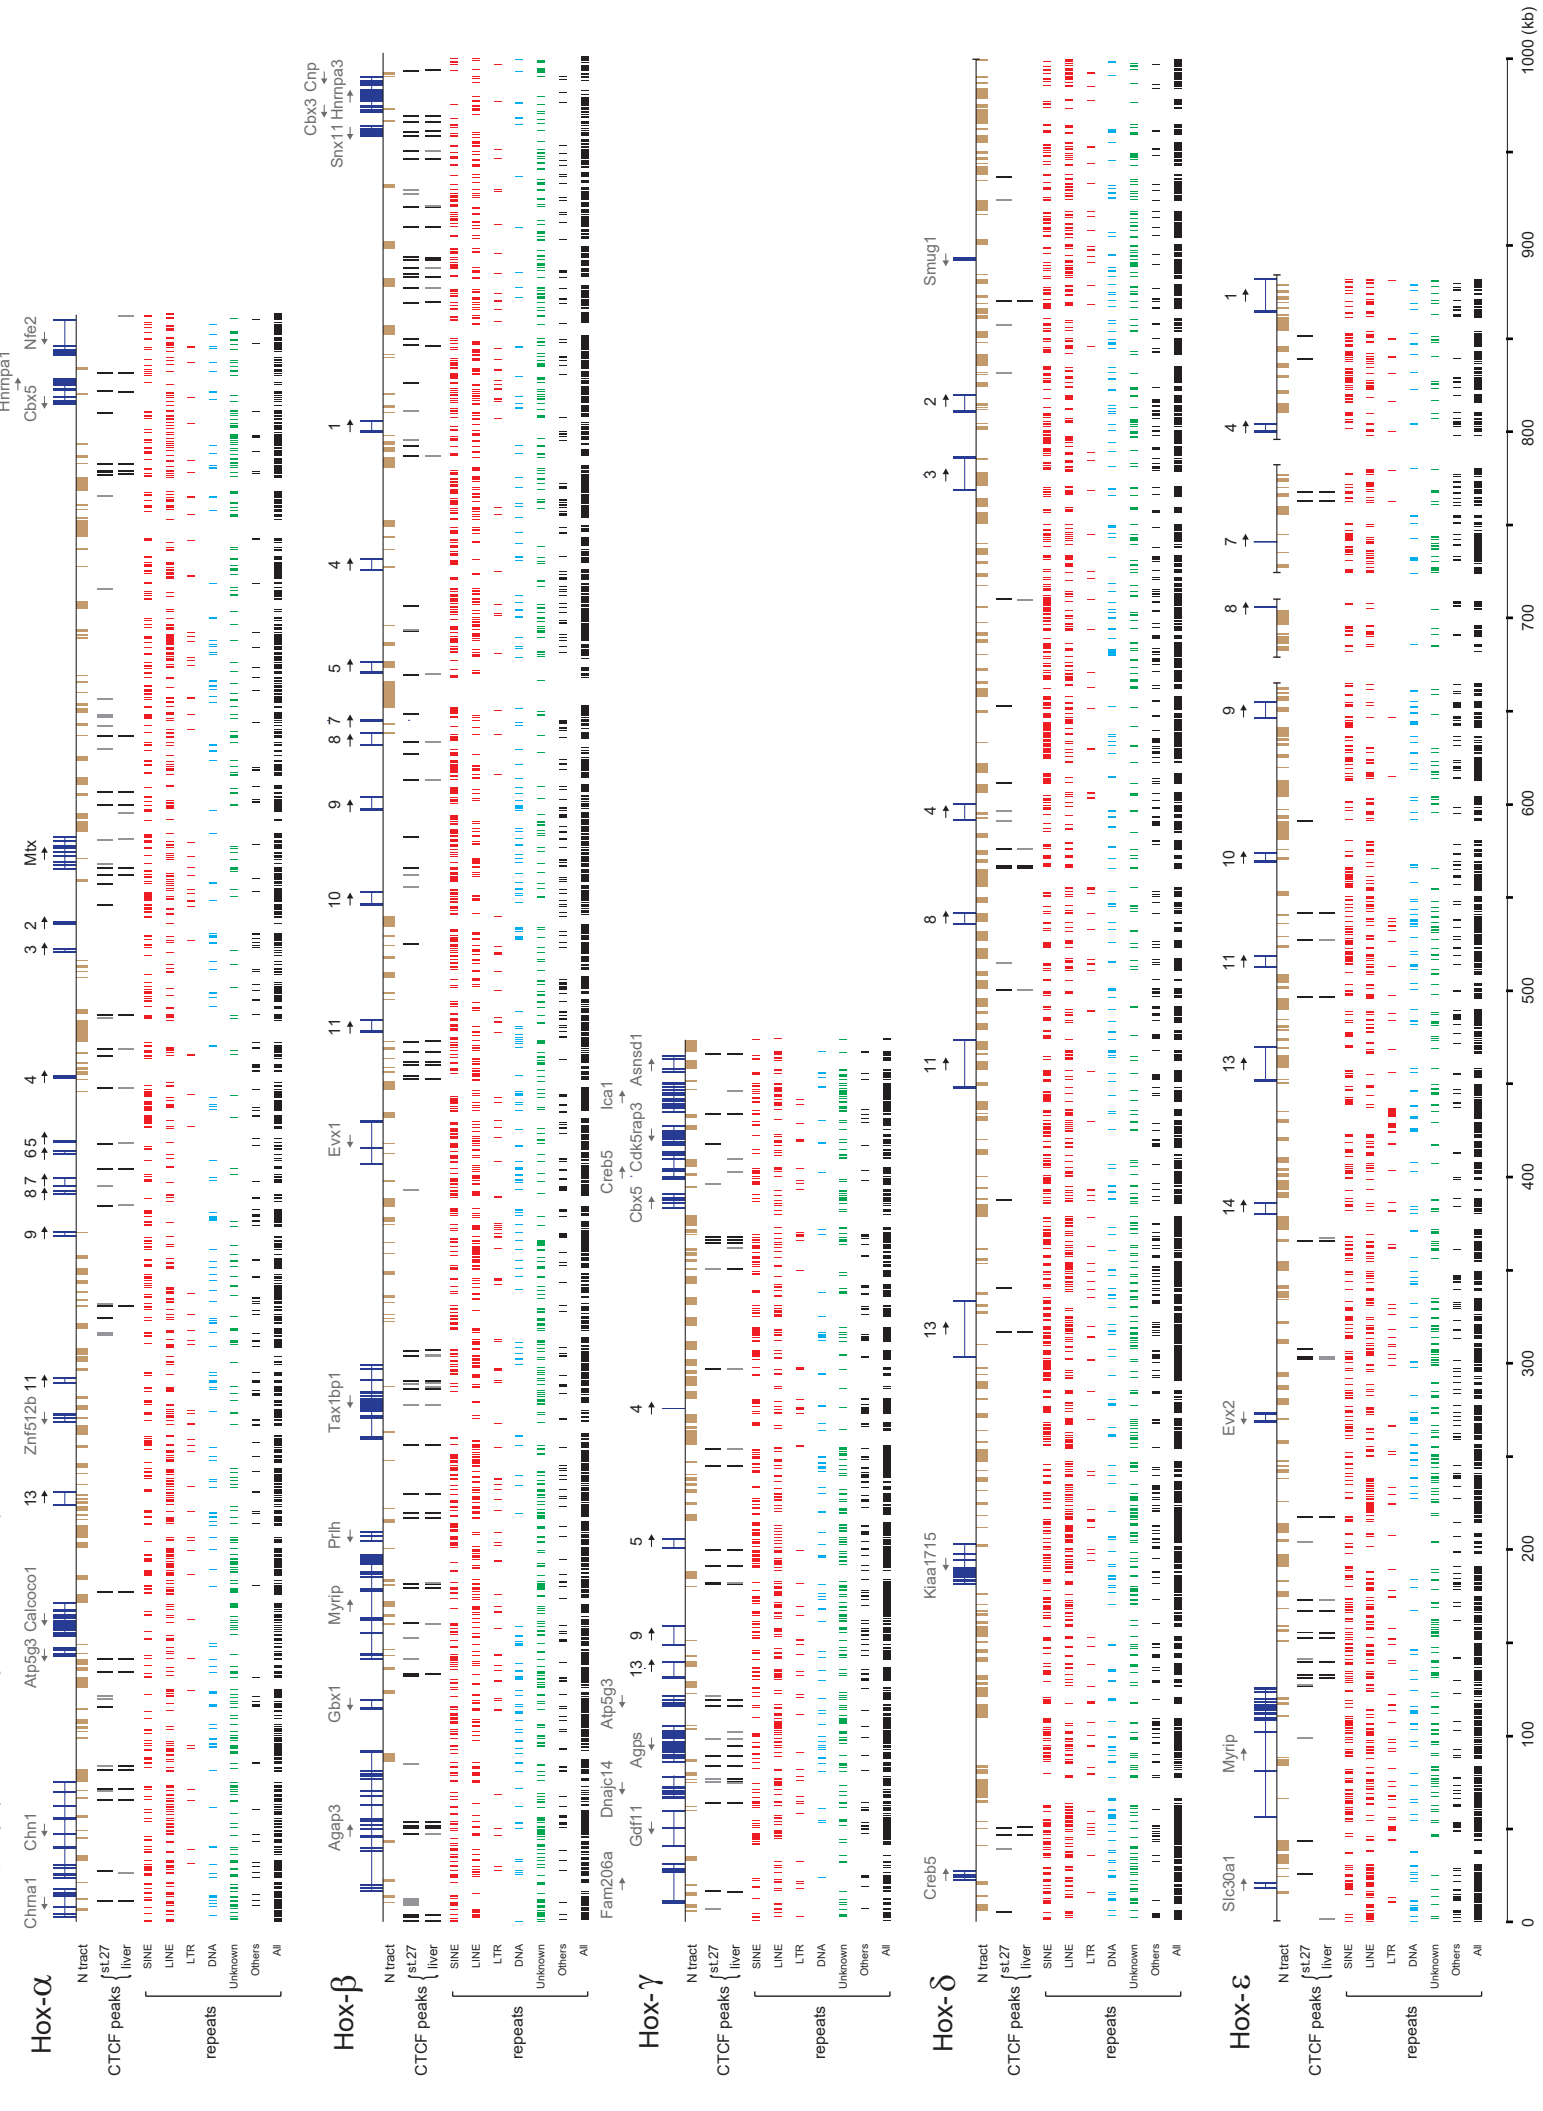

**b** Chicken (st.25 embryo)

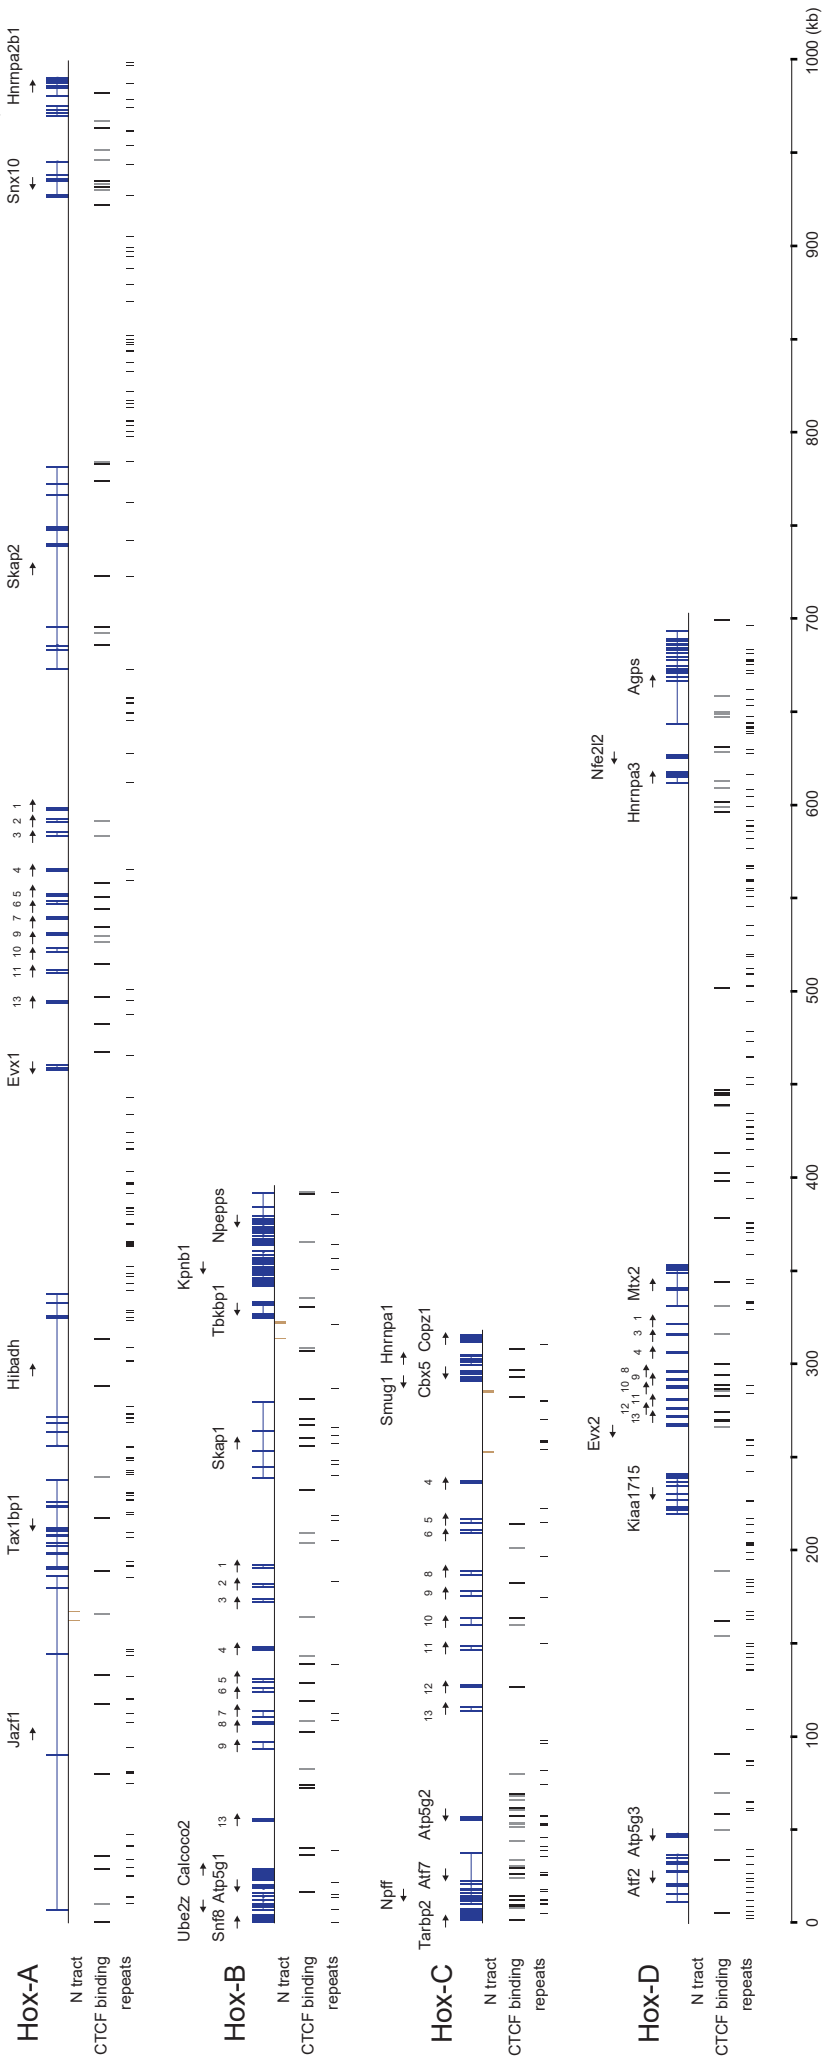

**c** Mouse (E14.5 brain, E14.5 MEF, ES cells)

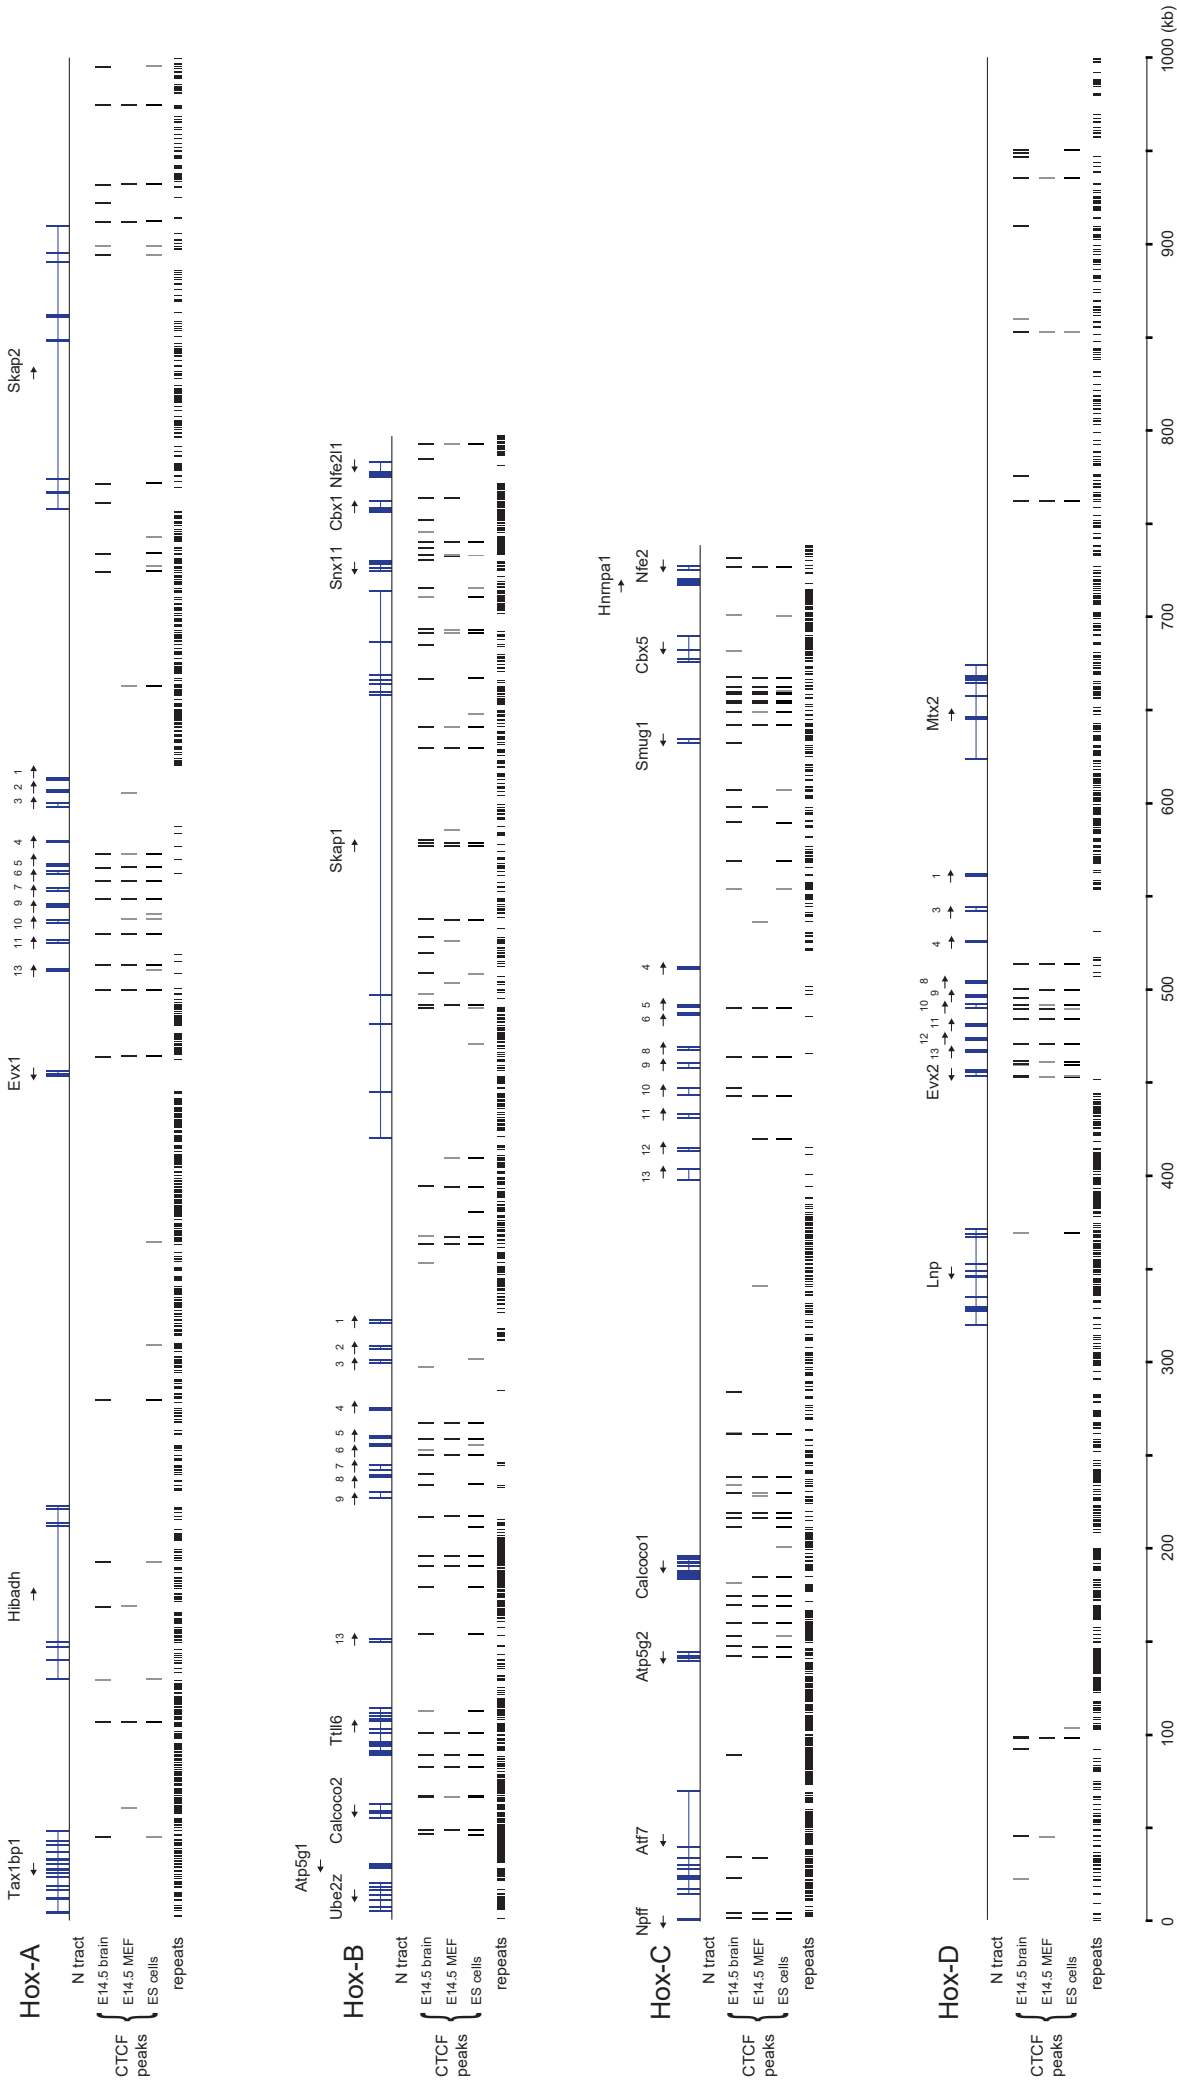

**d** Human (GM12878 cells)

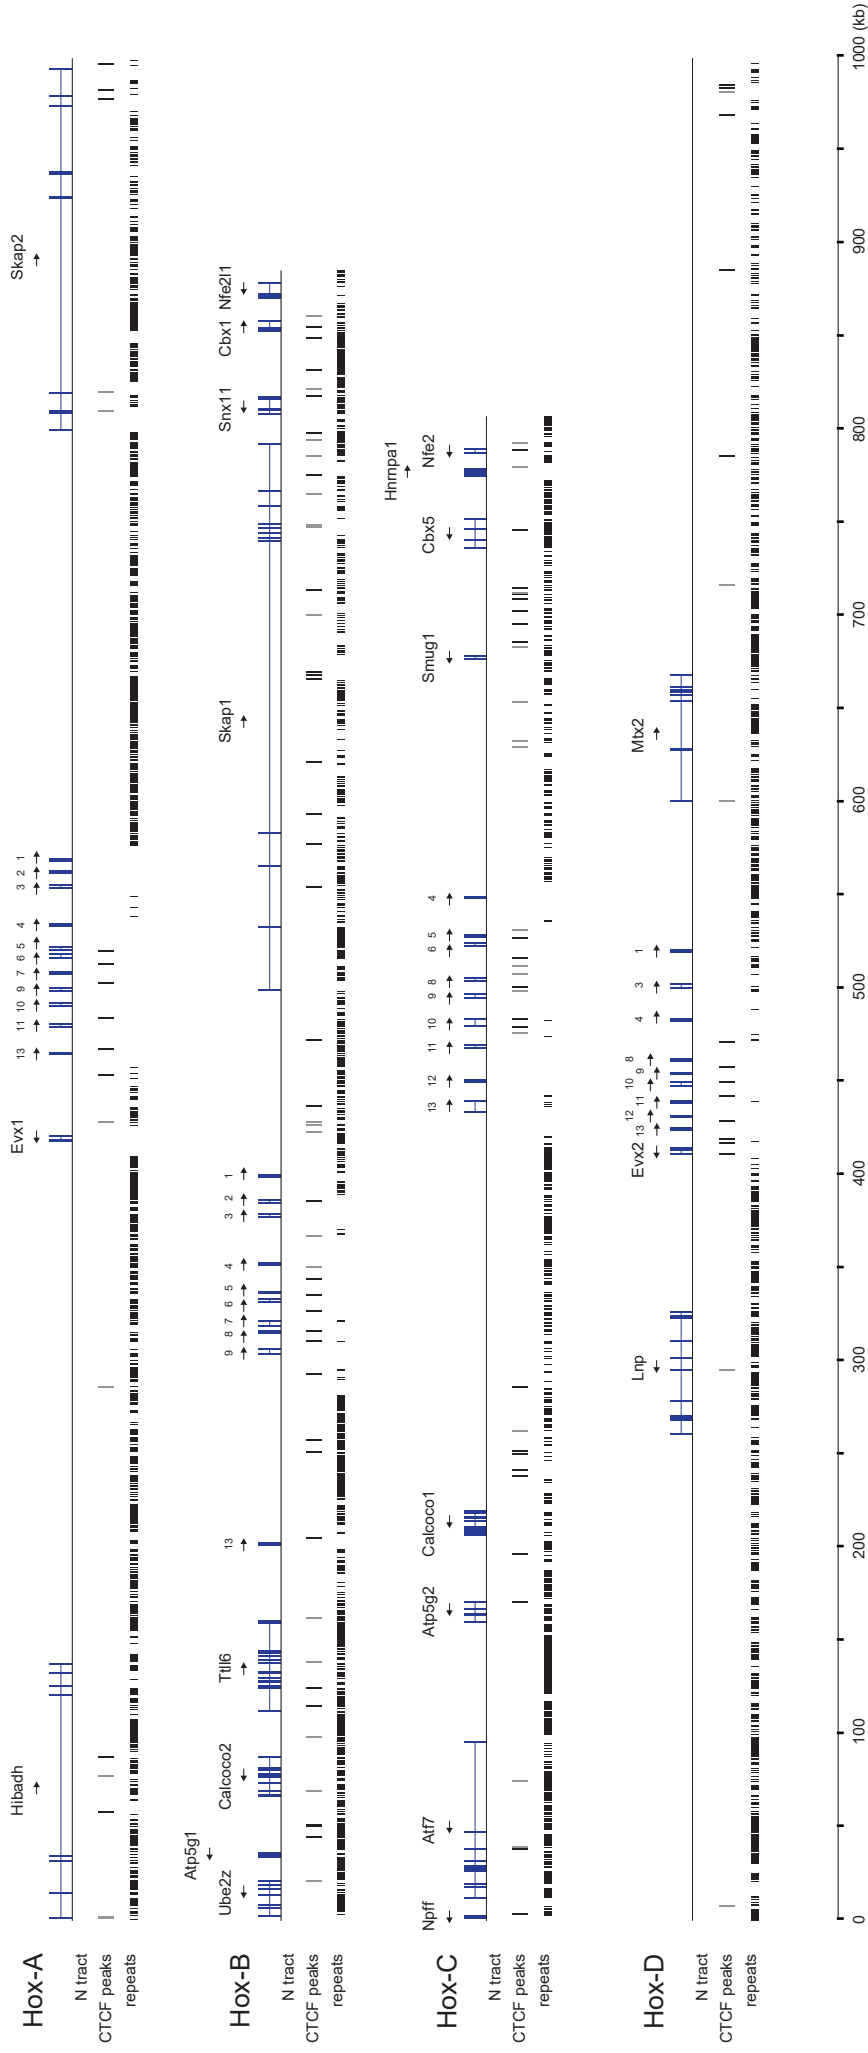

**e**

Dog (adult liver)

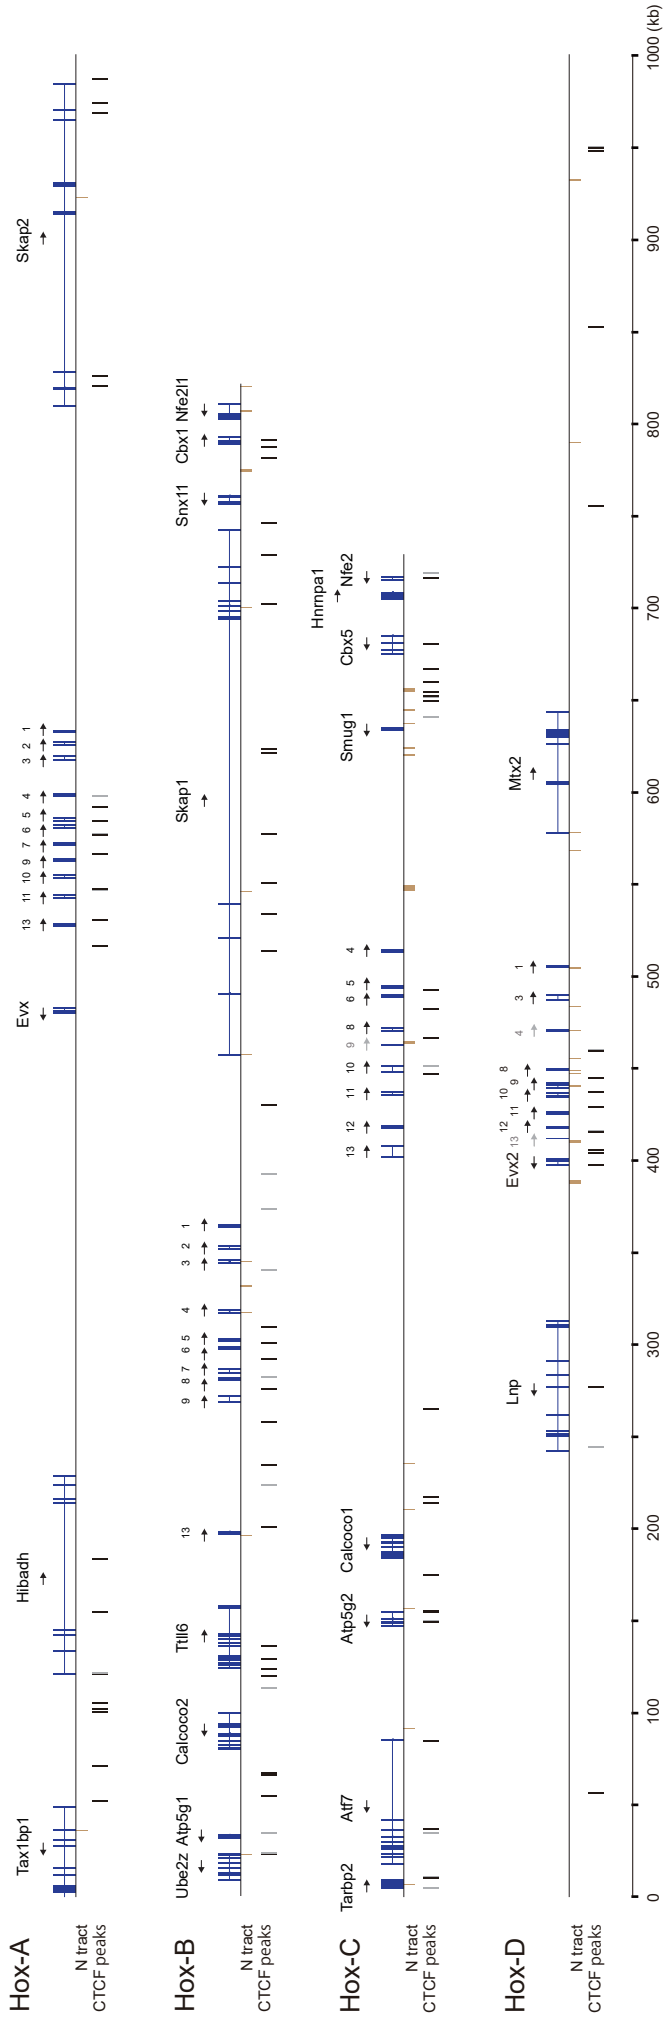**f**

Opossum (adult liver)

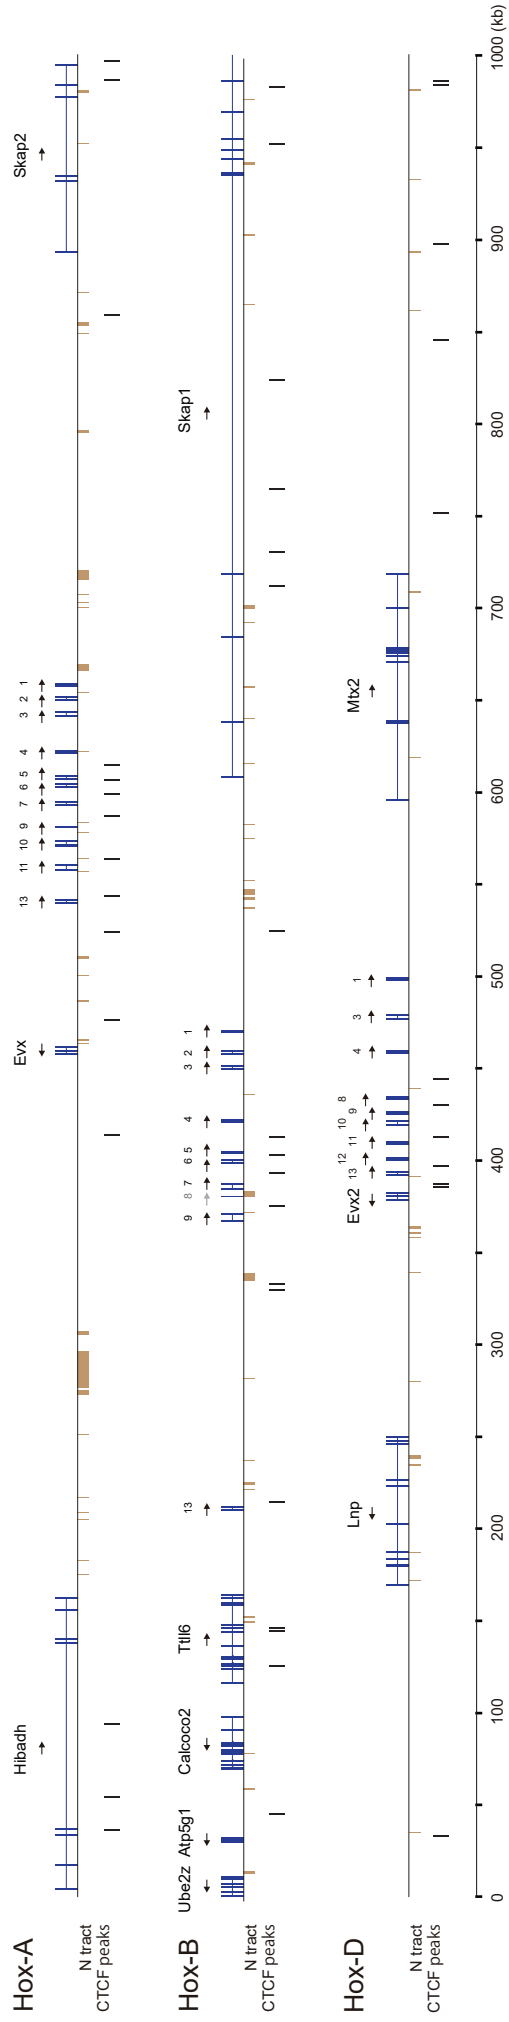



**Fig. S7.** Lamprey, chicken, mouse, human, dog, and opossum Hox gene clusters with locations of CTCF ChIP-seq peaks. **(a)** Lamprey Hox gene clusters in the LetJap1.0 genome assembly.  $\alpha$  (on scaffold KE993675.1),  $\beta$  (on scaffold KE993672.1),  $\gamma$  (on scaffold KE993746.1),  $\delta$  (on scaffold KE993858.1), and  $\epsilon$  (on scaffolds KE993970.1, KE995814.1, KE995158.1, and KE994851.1) clusters are shown. Gene names given by Mehta *et al.*<sup>2</sup> are indicated in black letters. Gene names in grey letters are the names of human RefSeq proteins that showed the highest similarity in BLASTP searches in this study. CTCF peaks identified in stage 27 embryo, and adult liver samples are shown. Included in ‘Others’ are the repeats (52 entries) classified as RC/Helitron, satellite, simple repeat, buffer, and rRNA. **(b)** Chicken Hox gene clusters in the galGal5 genome assembly. CTCF peaks in stage 25 embryo are shown with the location of interspersed repeats. **(c)** Mouse Hox gene clusters in the mm10 genome assembly. CTCF binding peaks in E14.5 embryonic tissue samples (brain and MEF) and ES cells are shown with the location of interspersed repeats. **(d)** Human Hox clusters in the hg19 genome assembly. CTCF peaks in GM12878 cells are shown with the location of interspersed repeats. **(e)** Dog Hox clusters in the CanFam3.1 genome assembly. CTCF peaks in the adult liver are shown. **(f)** Opossum Hox clusters in the MonDom5 genome assembly. Hox C genes were not identified as a cluster in the genome assembly. CTCF peaks in the adult liver are shown. For lamprey, chicken, and human, the summits of CTCF ChIP-seq peaks are shown differentially for two categories: “significant peaks” indicated with black bars and “consensus peaks” (only those with  $\geq 5$  fold of enrichments) indicated with gray bars (see Materials and Methods for the details of the definition of “significant peaks” and “consensus peaks”). For mouse and dog, peaks are shown for two categories, peaks with  $\geq 10$  fold of enrichments indicated with black bars, and peaks with  $\geq 5$  fold of enrichments with gray bars. For opossum, peaks with  $\geq 5$  fold of enrichments are indicated with black bars. Regions filled with undetermined bases are indicated in the row “N tract”. In **(b)-(d)**, all repeat categories are collapsed and shown in one row.

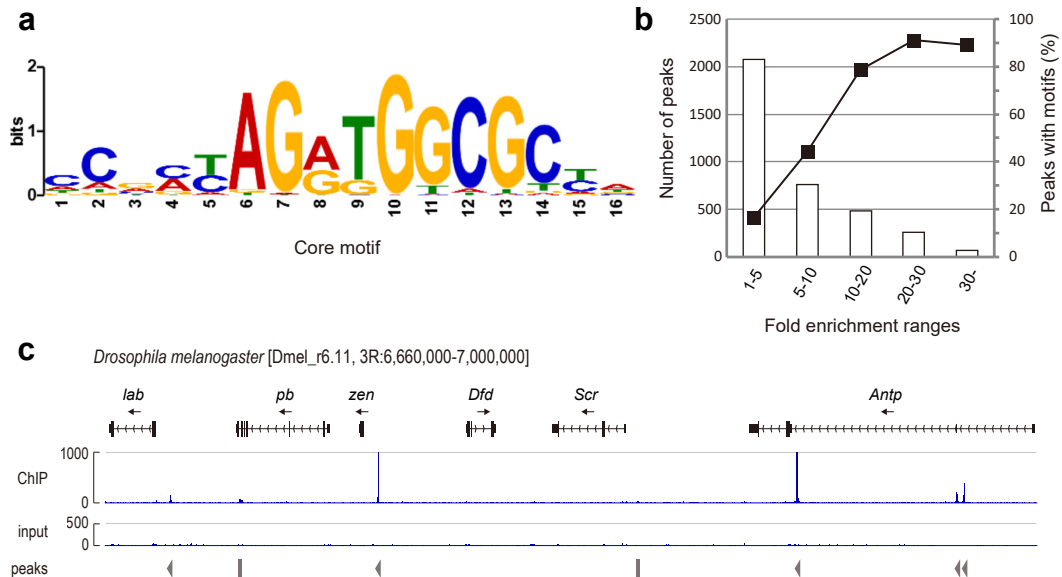

**Fig. S8.** Identification of CTCF ChIP-seq peaks and binding motifs in *Drosophila melanogaster*. **(a)** Top 500 peaks ranked in the order of fold enrichment were used for motif identification by MEME. **(b)** Numbers of ChIP-seq peaks at various fold-enrichment ranges are shown in white bars. Proportion of peaks containing the core motif is shown in a line. **(c)** ChIP-seq results at the *Antennapedia* complex (ANT-C). Peaks with more than 10 folds of enrichment were analyzed for core motif identification by FIMO. Gray arrowheads indicate peaks with the CTCF binding motif inside and its orientation, while gray bars represent peaks that contained no CTCF motif. Interestingly, all the identified CTCF motifs were oriented towards the 3' end of the cluster. It was also shown that the ANT-C has two outstanding CTCF peaks, between *pb* and *Dfd* genes as well as within the *Antp* gene. The ChIP-seq data were obtained from NCBI SRA (SRR066831-SRR066836) and processed as described in Supplementary Materials and Methods. These data, originally in triplicates, were merged into one and mapped to the *D. melanogaster* genome assembly Dmel r6.11.

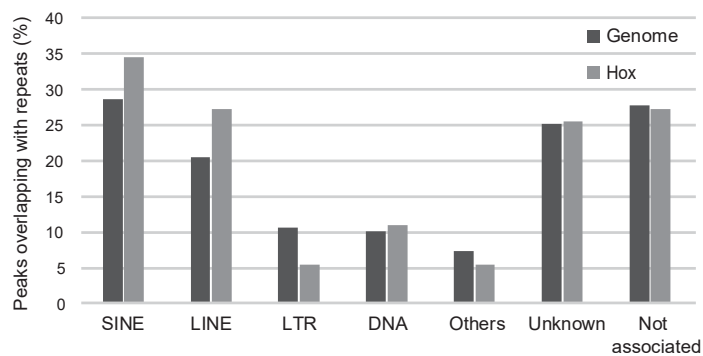

**Fig. S9.** Association of CTCF ChIP-seq peaks with interspersed repeat elements in Arctic lamprey Hox clusters. Significant peaks (peak summit  $\pm$  100 bp) in the whole genome of lamprey and in the Hox cluster region, were analyzed for their association with repeat elements. Number of peaks overlapping with repeat classes of SINE, LINE, LTR element, and DNA element were divided by the total number of peaks (27,633 in LetJap1.0, and 55 in Hox  $\alpha\sim\epsilon$  clusters). Overlap of ChIP-seq peaks to the repeats were 72.3 % (19981 out of 27633) genome-wide, and 72.7 % (40 out of 55) inside Hox  $\alpha\sim\epsilon$  clusters.

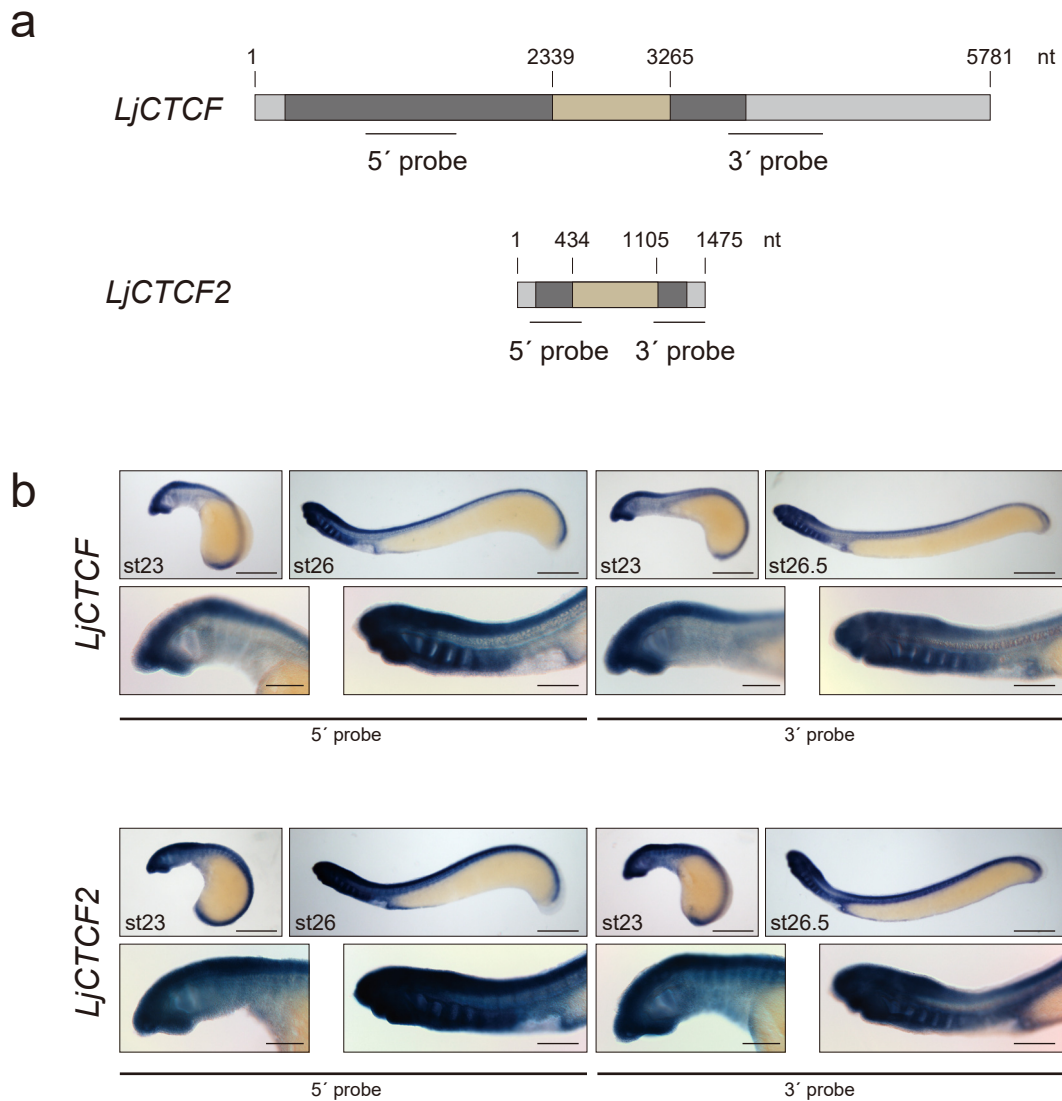

**Fig. S10.** Embryonic expression patterns of *L. camtschaticum* *CTCF* and *CTCF2*. **(a)** Locations of the two riboprobes (5' and 3' probes) designed for *CTCF* and *CTCF2* transcripts. Untranslated regions, Zn finger domains, and other coding regions are indicated in gray, brown, and dark gray, respectively. Templates of the riboprobes were amplified from the cDNA of stage 27 embryos with the oligonucleotide primers in Supplementary Table S7, and cloned into pCRII-TOPO vector (Thermo Fisher Scientific). Insert sequences were amplified by PCR with M13 reverse and forward primers, and 1.5  $\mu\text{g}$  of the purified PCR product was used to generate Digoxigenin-labeled anti-sense cRNA probes with DIG RNA Labeling Kit (Roche Diagnostics). **(b)** Whole-mount *in situ* hybridization on *L. camtschaticum* embryos at stages (st) 23, 26 and 26.5. Photos are shown for whole bodies (top) and their magnifications (bottom). Results obtained for stage 26.5 embryos with the 3' probe is included in Fig. 1c. Scale bars: 500  $\mu\text{m}$  for the whole embryo panels, and 200  $\mu\text{m}$  for the enlargement panels.

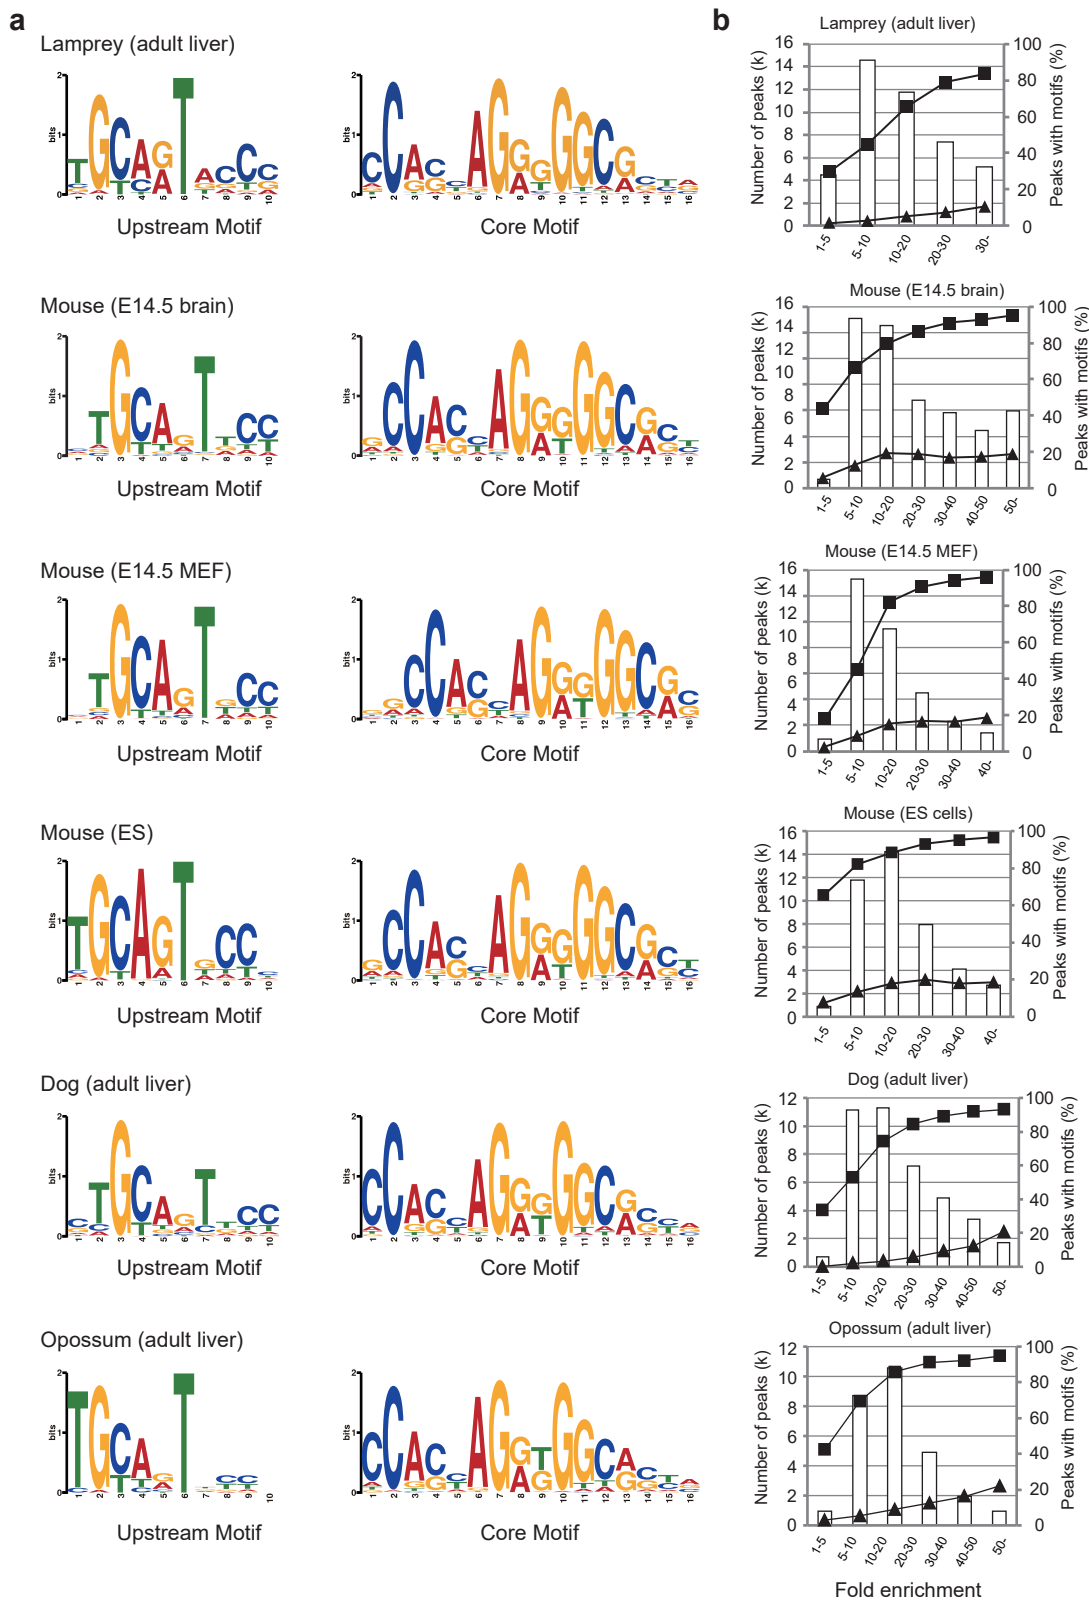

**Fig. S11.** Characterizing CTCF ChIP-seq peaks in adult lamprey liver, mouse E14.5 embryonic tissues, mouse ES cells, adult dog liver, and adult opossum liver. **(a)** Upstream and core CTCF binding motifs were identified for each of the samples from the top 2,000 ChIP-seq peaks ranked by fold enrichment. ChIP-seq data for mouse were obtained from NCBI SRA (SRR392354, SRR505014, SRR207080, SRR207071, SRR207089, and SRR207081). ChIP-seq data for dog and opossum were obtained from EBI ENA (ERR022285, ERR022304, ERR022303, ERR022307, ERR022306, and ERR022301). Data analysis for the lamprey liver was performed as described for embryonic samples in Materials and Methods. Data analysis for mouse, dog, and opossum were performed as described in Supplementary Materials and Methods. **(b)** Numbers of ChIP-seq peaks at various fold-enrichment ranges are shown with white bars. The proportion of peaks containing the core motif and core+upstream motifs are shown as lines with rectangles and triangles, respectively.

**Table S1.** RNA-seq read statistics.

| Sample*      | Number of sequence reads <sup>†</sup> |                                    | Number of mapped reads |                 |                                 |                                                             |
|--------------|---------------------------------------|------------------------------------|------------------------|-----------------|---------------------------------|-------------------------------------------------------------|
|              | Raw reads                             | After adaptor and quality trimming | Mapped to LetJap1.0    | Mapped to mtDNA | Total mapped reads <sup>‡</sup> | Mapping to coding sequences of predicted genes <sup>§</sup> |
| St.25 embryo | 27,208,544                            | 27,177,307                         | 20,778,876             | 1,195,521       | 21,974,397                      | 7,570,402                                                   |
| St.27 embryo | 31,137,471                            | 31,112,336                         | 24,290,291             | 1,071,675       | 25,361,966                      | 8,615,655                                                   |
| Liver        | 22,035,421                            | 22,012,367                         | 17,910,695             | 356,824         | 18,267,519                      | 9,457,519                                                   |
| Eye          | 21,344,072                            | 21,316,324                         | 16,974,223             | 537,714         | 17,511,937                      | 5,174,121                                                   |
| Brain        | 22,174,962                            | 22,141,906                         | 16,152,759             | 1,960,000       | 18,112,759                      | 5,232,088                                                   |
| Intestine    | 23,666,023                            | 23,647,364                         | 16,696,683             | 1,127,148       | 17,823,831                      | 5,503,856                                                   |
| Heart        | 21,762,562                            | 21,747,218                         | 12,047,351             | 4,107,753       | 16,155,104                      | 4,528,816                                                   |
| Muscle       | 21,296,661                            | 21,281,171                         | 14,530,740             | 2,757,501       | 17,288,241                      | 5,364,705                                                   |
| Testis       | 21,155,398                            | 21,133,322                         | 16,091,112             | 838,231         | 16,929,343                      | 5,442,523                                                   |
| Oocyte       | 22,006,934                            | 21,917,663                         | 18,190,134             | 108,795         | 18,298,929                      | 7,487,285                                                   |

\* Stage 25 and stage 27 RNAs were extracted from pooled embryos; testis RNA was from a single male; oocyte RNA from pooled unfertilized oocytes, and all other RNAs were from a single female.

<sup>†</sup> Single-end 80 nt reads were obtained in the Rapid Run mode of HiSeq1500.

<sup>‡</sup> Mapping was performed by Tophat2 without the use of gene model; unmapped reads were mapped to the mitochondrion genome (KF701113.1) by Bowtie.

<sup>§</sup> Mapping to coding sequences of the gene model based on AUGUSTUS (see Supplementary Materials and Methods) was performed by Bowtie2 with local alignment mode.

<sup>¶</sup> Sum of the numbers of reads mapped to LetJap1.0 and those mapped to mtDNA.

**Table S2.** Gene prediction statistics.

|                                               | Improved gene set | Original gene set |
|-----------------------------------------------|-------------------|-------------------|
| Number of genes                               | 34435             | 34320             |
| Completely reconstructed metazoan BUSCO genes | 652               | 651               |
| Missing metazoan BUSCO genes                  | 94                | 95                |
| Completely reconstructed CVG                  | 209               | 208               |
| Missing CVG                                   | 3                 | 3                 |
| Curated prediction                            |                   |                   |
| (i) split gene                                | 254               |                   |
| (ii) fusion gene                              | 172               |                   |
| (iii) truncated gene                          | 6298              |                   |
| (iv) newly predicted gene                     | 110               |                   |

**Table S3.** Identifications of chicken and lamprey CTCF in immunoprecipitation.**a.** Identified peptides in the Mascot search for chicken CTCF protein.

| Position | Score | Peptide*                             |
|----------|-------|--------------------------------------|
| 1-18     | 96    | -.MEGEAVEAIVEESETFIK.G               |
| 2-18     | 73    | M.EGEAVEAIVEESETFIK.G                |
| 23-27    | 12    | R.KTYQR.R                            |
| 145-168  | 29    | K.GGLQEGEPMICHTLPLPEGFQVVK.V         |
| 169-193  | 35    | K.VGANGEVETLEQGELQPQEDPNWQK.D        |
| 194-202  | 35    | K.DPDYQPPAK.K                        |
| 194-203  | 44    | K.DPDYQPPAKK.T                       |
| 214-244  | 62    | R.YTEEGKDVDVSVYDFEEEEQQEGLLSEVNAEK.V |
| 220-244  | 82    | K.DVDVSVYDFEEEEQQEGLLSEVNAEK.V       |
| 245-256  | 51    | K.VVGNMKPPKPTK.I                     |
| 264-277  | 119   | K.KTFQCELCSYTCPR.R                   |
| 265-277  | 65    | K.TFQCELCSYTCPR.R                    |
| 287-295  | 41    | K.SHTDERPHK.C                        |
| 311-323  | 57    | R.NHLNTHTGTRPHK.C                    |
| 324-324  | 95    | K.CPDCDMAFVTSSELVR.H                 |
| 345-352  | 30    | K.HTHEKPFK.C                         |
| 353-365  | 93    | K.CSMCDYASVEVSK.L                    |
| 372-389  | 53    | R.SHTGERPFQCSLCSYASR.D               |
| 400-415  | 79    | R.THSGEKPYECYICAR.F                  |
| 416-423  | 39    | R.FTQSGTMK.M                         |
| 424-429  | 37    | K.MHILQK.H                           |
| 430-436  | 37    | K.HTENVAK.F                          |
| 437-448  | 43    | K.FHCPHCDTVIAR.K                     |
| 449-457  | 55    | R.KSDLGVHLR.K                        |
| 450-457  | 50    | K.SDLGVHLR.K                         |
| 458-467  | 55    | R.KQHSYIEQGK.K                       |
| 459-467  | 33    | K.QHSYIEQGK.K                        |
| 471-479  | 59    | R.YCDAVFHER.Y                        |
| 480-487  | 38    | R.YALIQHQK.S                         |
| 495-505  | 60    | R.FKCDQCDYACR.Q                      |
| 497-505  | 58    | K.CDQCDYACR.Q                        |
| 509-514  | 35    | R.HMVMHK.R                           |
| 516-530  | 57    | R.THTGEKPYACSHCDK.T                  |
| 544-559  | 24    | K.RYHDPNFVPAAFVCSK.C                 |
| 545-559  | 56    | R.YHDPNFVPAAFVCSK.C                  |
| 563-566  | 17    | K.TFTR.R                             |
| 573-592  | 92    | R.HADNCSGLDGGEGENGGETK.K             |
| 573-593  | 85    | R.HADNCSGLDGGEGENGGETKK.G            |
| 654-665  | 12    | R.GRPPGKAATQTK.Q                     |
| 666-691  | 64    | K.QSQPAAIIQVEDQNTGEIENIIVEVK.K       |

\* Only the distinct peptide sequences are shown.

Mass spectrum was queried by NCBIInr including the chicken CTCF sequence (NCBI NP\_990663).

Mascot results: Score: 1348, Mass: 84315, Matches: 99(58), Sequences 40(31), emPAI: 3.4



**b. Identified peptides in the Mascot search for lamprey CTCF protein.**

| Position  | Score | Peptide*                        |
|-----------|-------|---------------------------------|
| 23-46     | 29    | R.LKEGGPPTQGTGLVDDDPTSNIPIK.K   |
| 25-46     | 59    | K.EGGPPTQGTGLVDDDPTSNIPIK.K     |
| 47-70     | 38    | K.KPEESEDGDLQVPLVSEVALAVK.D     |
| 197-209   | 82    | K.ESDDAFADAGSLR.V               |
| 289-312   | 68    | R.DTGDETNSAEVDAVVESVDVNELK.A    |
| 507-514   | 45    | R.GMLTEVVR.I                    |
| 584-594   | 81    | K.VGPNGELEVER.A                 |
| 595-621   | 61    | R.APMGSQDGSVDGDGIGLLITAPDPEER.S |
| 624-634   | 50    | K.EKDPDYQLPVK.K                 |
| 669-679   | 63    | R.LVSSQDVGVEK.A                 |
| 680-690   | 27    | K.AIAPKPPKPTR.I                 |
| 698-711   | 35    | K.KTFQCELCSYTCPR.R              |
| 699-711   | 61    | K.TFQCELCSYTCPR.R               |
| 713-720   | 27    | R.SNLDRHMK.S                    |
| 736-744   | 14    | R.AFRTVTLLR.N                   |
| 739-744   | 14    | R.TVTLLR.N                      |
| 745-757   | 49    | R.NHVNTHTGKPHK.C                |
| 758-786   | 102   | K.CMECDMAFVTSSELVR.H            |
| 779-786   | 31    | R.HTHEKPFK.C                    |
| 787-799   | 93    | K.CSMCDYASVEVSK.L               |
| 806-823   | 41    | R.SHTGERPFQCGLCYASR.D           |
| 834-849   | 27    | R.THSGEKPYECHVCHAR.F            |
| 850-857   | 41    | R.FTQSGTMK.M                    |
| 858-863   | 37    | K.MHVLQK.H                      |
| 864-870   | 39    | K.HTDNVPK.Y                     |
| 871-882   | 56    | K.YHCPHCDAVIAR.K                |
| 883-891   | 60    | R.KSDLGVHLR.K                   |
| 884-891   | 59    | K.SDLGVHLR.K                    |
| 892-899   | 23    | R.KQHAVLER.E                    |
| 893-899   | 6     | K.QHAVLER.E                     |
| 908-913   | 12    | R.AIFHER.Y                      |
| 914-921   | 49    | R.YALMQHQR.T                    |
| 929-939   | 56    | R.FKCDQCEYACK.Q                 |
| 931-939   | 57    | K.CDQCEYACK.Q                   |
| 950-964   | 45    | R.VHTGEKPFECTLCDK.T             |
| 979-993   | 60    | R.YHDPSFVPTTYECSK.C             |
| 997-1000  | 17    | R.NFTR.R                        |
| 1007-1023 | 44    | K.HFDMCDGELESGEQNGK.A           |
| 1091-1098 | 24    | K.AKPGRPAK.K                    |
| 1099-1107 | 36    | K.KVAGSAEIK.T                   |
| 1100-1107 | 21    | K.VAGSAEIK.T                    |
| 1100-1111 | 7     | K.VAGSAEIKTEPK.T                |
| 1177-1193 | 105   | K.EHVVLAVETAADGPK.N             |
| 1194-1207 | 69    | K.NDITPEMILSMMDQ.               |

\* Only the distinct peptide sequences are shown.

Mass spectrum was queried by LJ-GRAS including the lamprey CTCF sequences NCBI KX830966 and KX830967.

Mascot results: Score: 2082, Mass: 132346, Matches: 97(77), Sequences: 44(37), emPAI: 2.26

**Table S4.** ChIP-seq read statistics.

| Sample                          | Source                           | Number of sequence reads* |            |                                    |            | Number of mapped reads <sup>†</sup> |            |                       |            |
|---------------------------------|----------------------------------|---------------------------|------------|------------------------------------|------------|-------------------------------------|------------|-----------------------|------------|
|                                 |                                  | Raw reads                 |            | After adaptor and quality trimming |            | Total mapped reads                  |            | Uniquely mapped reads |            |
|                                 |                                  | Input                     | ChIP       | Input                              | ChIP       | Input                               | ChIP       | Input                 | ChIP       |
| Lamprey_embryo_rep1             | stage 27 embryos                 | 16,272,896                | 15,843,949 | 16,183,265                         | 15,451,120 | 10,823,154                          | 11,221,293 | 9,962,493             | 10,521,159 |
| Lamprey_embryo_rep2             | stage 27 embryos                 | -                         | 23,604,055 | -                                  | 23,430,927 | -                                   | 17,186,550 | -                     | 16,269,247 |
| Lamprey_liver_rep1              | adult liver                      | 22,461,304                | 23,312,665 | 22,441,376                         | 23,197,106 | 14,865,760                          | 16,905,819 | 13,718,717            | 15,915,635 |
| Lamprey_liver_rep2              | adult liver                      | -                         | 21,757,545 | -                                  | 21,711,361 | -                                   | 15,818,226 | -                     | 14,867,890 |
| Chicken_embryo_rep1             | stage 25 embryo                  | 20,831,237                | 20,535,419 | 20,665,306                         | 19,383,148 | 18,720,394                          | 17,352,906 | 17,674,598            | 16,486,659 |
| Chicken_embryo_rep2             | stage 25 embryo                  | -                         | 22,769,250 | -                                  | 22,738,229 | -                                   | 20,387,074 | -                     | 19,455,585 |
| Human_GM12878_rep1 <sup>‡</sup> | GM12878 lymphoblastoid cell line | 23,479,237                | 22,031,342 | 23,000,738                         | 21,893,794 | 21,543,427                          | 20,854,117 | 19,688,311            | 19,336,104 |
| Human_GM12878_rep2              | GM12878 lymphoblastoid cell line | -                         | 23,012,033 | -                                  | 22,989,381 | -                                   | 21,846,970 | -                     | 20,413,462 |

\* Single-end 80 nt reads were sequenced by the Rapid Run mode of HiSeq 1500 except for human\_GM12878\_rep1.

<sup>†</sup> Lamprey and chicken ChIP-seq reads were mapped against Letlap1.0 and galGal5 genome assemblies, respectively, allowing multi-map (-m 5), whereas human reads were mapped against hg19 genome at single map (-m 1) condition of Bowtie (see Materials and Methods for details).

<sup>‡</sup> 101 nt-long paired-end reads were produced by the High-Output mode of HiSeq 1500, and only the read 1 trimmed to 80 bp were used for data analysis.

**Table S5.** CTCF peaks selected with various criteria.

| Sample              | Number of peaks called by MACS2 |                                         | Number of selected peaks     |                                |
|---------------------|---------------------------------|-----------------------------------------|------------------------------|--------------------------------|
|                     | Peaks in each replicate*        | Peaks in merged replicates <sup>†</sup> | Consensus peaks <sup>‡</sup> | Significant peaks <sup>§</sup> |
| Lamprey_embryo_rep1 | 46,673                          | 50,549                                  | 43,484                       | 27,633                         |
| Lamprey_embryo_rep2 | 52,854                          |                                         |                              |                                |
| Lamprey_liver_rep1  | 51,661                          | 48,617                                  | 43,295                       | 24,275                         |
| Lamprey_liver_rep2  | 50,872                          |                                         |                              |                                |
| Chicken_embryo_rep1 | 36,412                          | 48,269                                  | 33,554                       | 16,382                         |
| Chicken_embryo_rep2 | 58,620                          |                                         |                              |                                |
| Human_GM12878_rep1  | 58,856                          | 59,754                                  | 53,066                       | 29,542                         |
| Human_GM12878_rep2  | 63,551                          |                                         |                              |                                |

\*Peaks were called for individual samples using the mapping result of input library for 'rep1' sample as control.

<sup>†</sup>Peaks were called for merged mapping results between both 'rep1' and 'rep2' samples using the mapping result of the input library for 'rep1' sample as control.

<sup>‡</sup>Peaks identified as intersect between peaks in 'rep1', peaks in 'rep2' and peaks in merged replicates.

<sup>§</sup>Subset of "consensus peaks" with their fold enrichment for "merged replicates" of  $\geq 10$  (for lamprey and chicken) and  $\geq 20$  (for human).

**Table S6.** Repeat contents of the whole genomes and Hox gene clusters of the four vertebrate species analyzed in this study.

| Repeat categories*           | <i>L. japonicum</i> (Letlap1.0) | <i>G. gallus</i> (galGal5) | <i>H. sapiens</i> (hg19)                  | <i>M. musculus</i> (mm10) |                      |        |                      |        |                      |
|------------------------------|---------------------------------|----------------------------|-------------------------------------------|---------------------------|----------------------|--------|----------------------|--------|----------------------|
| Class                        | Sub-class                       | Genome                     | Hox $\alpha$ - $\varepsilon$ <sup>†</sup> | Genome                    | Hox A-D <sup>†</sup> | Genome | Hox A-D <sup>†</sup> | Genome | Hox A-D <sup>†</sup> |
| SINE                         | Total                           | 9.43                       | 15.67                                     | 0.01                      | 0                    | 7.11   | 3.67                 | 7.24   | 4.14                 |
|                              | ALU                             | 0                          | 0                                         | 0                         | 0                    | 5.96   | 3.43                 | 4.87   | 3.04                 |
|                              | MIR                             | 0                          | 0                                         | 0                         | 0                    | 1.14   | 0.23                 | 0.01   | 0.01                 |
| LINE                         | Total                           | 12.05                      | 8.59                                      | 7.05                      | 0.04                 | 20.36  | 5.81                 | 18.58  | 1.28                 |
|                              | LINE1                           | 0.01                       | 0                                         | 0.06                      | 0.02                 | 19.36  | 5.69                 | 18.08  | 1.06                 |
|                              | LINE2                           | 2.16                       | 1.46                                      | 0                         | 0                    | 0.99   | 0.11                 | 0.46   | 0.21                 |
|                              | L3/CR1                          | 0                          | 0                                         | 6.92                      | 0.03                 | 0.01   | 0.01                 | 0      | 0                    |
|                              | Total                           | 4.39                       | 1.82                                      | 2.8                       | 0.06                 | 5.85   | 0.75                 | 10.04  | 1.38                 |
| LTR elements                 | ERV1                            | 0                          | 0                                         | 1.63                      | 0.02                 | 2.01   | 0.43                 | 2.25   | 0.26                 |
|                              | ERV1-MaLRs                      | 0                          | 0                                         | 0                         | 0                    | 1.61   | 0.27                 | 2.69   | 0.49                 |
|                              | ERV_class I                     | 0                          | 0                                         | 0.79                      | 0.03                 | 2.02   | 0.05                 | 1      | 0.07                 |
|                              | ERV_class II                    | 0                          | 0                                         | 0.19                      | 0                    | 0.2    | 0                    | 4.08   | 0.57                 |
| DNA elements                 | Total                           | 4.06                       | 3.71                                      | 1.02                      | 0.16                 | 2.24   | 0.64                 | 1.12   | 0.32                 |
|                              | hAT-Charlie                     | 0.53                       | 0.32                                      | 0.15                      | 0                    | 0.8    | 0.18                 | 0.33   | 0.04                 |
|                              | TcMar-Tigger                    | 0.78                       | 0.44                                      | 0                         | 0                    | 0.82   | 0.11                 | 0.06   | 0                    |
| Unclassified                 | 8.29                            | 5.75                       | 1.17                                      | 0.04                      | 0.99                 | 0.07   | 0.87                 | 0      |                      |
| Total interspersed repeats   | 38.22                           | 35.52                      | 12.06                                     | 0.31                      | 36.54                | 10.94  | 37.85                | 7.11   |                      |
| Small RNA                    | Small RNA                       | 5.34                       | 13.16                                     | 0.15                      | 0.01                 | 0.03   | 0.02                 | 0.01   | 0                    |
|                              | Satellites                      | 0.9                        | 0.64                                      | 4.82                      | 0.07                 | 0.07   | 0                    | 0.33   | 0                    |
| Simple repeats               | Simple repeats                  | 1.39                       | 1.81                                      | 1.25                      | 0.14                 | 0.02   | 0                    | 0.02   | 0.02                 |
|                              | Low complexity                  | 0                          | 0                                         | 0                         | 0                    | 0      | 0                    | 0      | 0                    |
| Total number of bases masked | 40.35                           | 37.6                       | 18.18                                     | 0.53                      | 36.5                 | 10.93  | 38                   | 7.06   |                      |

RepeatMasker analysis was carried out for the whole genome and Hox clusters using the custom repeat library generated by RepeatModeler for each species. Shown are the percentages of repeat elements categorized into different (sub)classes.

\*Repeat categories are based on the classification by RepeatModeler.

<sup>†</sup>Sequences between the 5' and 3' ends of the Hox clusters were analyzed.

**Table S7.** Oligonucleotide primers used.

| Oligo name         | Nucleotide sequence (5'-3')              | Application                                       |
|--------------------|------------------------------------------|---------------------------------------------------|
| Lj-CTCF-cDNA       | GACACACTTTTCTCAAACCTCAG                  | cloning; gene specific RT primer (lamprey CTCF)   |
| Lj-CTCF-ORF-f      | GGCGAGGAGGAGCCGAGAATCT                   | cloning, PCR primer (lamprey CTCF)                |
| Lj-CTCF-ORF-r      | TGGAGTTTAGTTAGTTTACCCGCTGCGAT            | cloning; PCR primer (lamprey CTCF)                |
| Lj-CTCF-seq1       | GATGGACGTTGTGGAAGTCA                     | Sanger sequence; sequence primer (lamprey CTCF)   |
| Lj-CTCF-seq2       | CTGGACGTGAGCACTAGCGT                     | Sanger sequence; sequence primer (lamprey CTCF)   |
| Lj-CTCF-seq3       | TGGATTGCTCATTACTGCC                      | Sanger sequence; sequence primer (lamprey CTCF)   |
| Lj-CTCF-seq4       | CACGAGAAGCCCTTCAAGTG                     | Sanger sequence; sequence primer (lamprey CTCF)   |
| Lj-CTCF-seq5       | ACTTTGACATGTGCGATGGA                     | Sanger sequence; sequence primer (lamprey CTCF)   |
| M13-forward        | CGACGTTGTAAAACGACGGCCAGT                 | Sanger sequence; sequence primer                  |
| M13-reverse        | GGAAACAGCTATGACCATG                      | Sanger sequence; sequence primer                  |
| AP                 | GGCCACGCGTCGACTAGTACTTTTTTTTTTTTTTTTTTTT | 3' RACE; RT primer                                |
| AUAP               | GGCCACGCGTCGACTAGTAC                     | 3' RACE; PCR primer                               |
| Lj-CTCF2-RACE-1    | CCACCACGAGAAGCACTTCAA                    | 3' RACE; gene specific PCR primer (lamprey CTCF2) |
| Lj-CTCF2-RACE-2    | GAAGAGCTCCATGAAATCCCA                    | 3' RACE; gene specific PCR primer (lamprey CTCF2) |
| Lj-CTCF2-cDNA      | CTCACCTCACAAAGCCGTT                      | cloning; gene specific RT primer (lamprey CTCF2)  |
| Lj-CTCF2-ORF-f     | CCACCCGTCATTTATCGTTGCAGCAG               | cloning, PCR primer (lamprey CTCF2)               |
| Lj-CTCF2-ORF-r     | CCTCACAAAGCCGTTCACTAACTCACCCAC           | cloning; PCR primer (lamprey CTCF2)               |
| Lj-Actb-f          | GCTGGTTGTGTGGTGGAGG                      | qPCR validation; PCR primer (lamprey Actb)        |
| Lj-Actb-r          | TAACAAAAGACCCGGCCGG                      | qPCR validation; PCR primer (lamprey Actb)        |
| Lj-Hox-alpha7-f    | GCCTCGGCTTATGCACCAG                      | qPCR validation; PCR primer (lamprey Hoxa7)       |
| Lj-Hox-alpha7-r    | CGCTGCCACGGCTCTTT                        | qPCR validation; PCR primer (lamprey Hoxa7)       |
| Gg-Actb-f          | CACCGAACGCTCCTCCCT                       | qPCR validation; PCR primer (chicken Actb1)       |
| Gg-Actb-r          | ACATCAGGTACGGCAACGG                      | qPCR validation; PCR primer (chicken Actb1)       |
| Gg-HoxB8-f         | CAACACCTTGATTTTATTAGCGG                  | qPCR validation; PCR primer (chicken HoxB8)       |
| Gg-HoxB8-r         | TCGGGATGGTTCCTGCTC                       | qPCR validation; PCR primer (chicken HoxB8)       |
| Hs-Gapdh-f         | CCACATCGCTCAGACACCAT                     | qPCR validation; PCR primer (human Gapdh)         |
| Hs-Gapdh-r         | AGCCACCCGCGAACTCA                        | qPCR validation; PCR primer (human Gapdh)         |
| Hs-H19-1f          | GCAGAAAYCGGTTGTAGTTGTGG                  | qPCR validation; PCR primer (human H19)           |
| Hs-H19-1r          | TGATGTGGGAGCCTGCAC                       | qPCR validation; PCR primer (human H19)           |
| Hs-H19-2f          | CCCGTGGAAACATCCCAG                       | qPCR validation; PCR primer (human H19)           |
| Hs-H19-2r          | TATACCTCACGACCCCTGTGAAC                  | qPCR validation; PCR primer (human H19)           |
| Hs-HoxA7-f         | CATATAGGCTCTGGGTGATCGC                   | qPCR validation; PCR primer (human HoxA7)         |
| Hs-HoxA7-r         | ATTTCCCAGCAAGCAGGGTA                     | qPCR validation; PCR primer (human HoxA7)         |
| #274-DNA-f         | CCAGCCACTAAGCGACCCTT                     | qPCR validation; PCR primer (lamprey hAT-Tip100)  |
| #274-DNA-r         | ACTCTAGGGGGCCCTCTGCT                     | qPCR validation; PCR primer (lamprey hAT-Tip100)  |
| #274-DNA-1f        | GAGCACCGCCGCTATT                         | qPCR validation; PCR primer (lamprey hAT-Tip100)  |
| #274-DNA-1r        | AACCAAATTTTGCTTAGGGCC                    | qPCR validation; PCR primer (lamprey hAT-Tip100)  |
| #274-DNA-2f        | GCCGAGTTTATTCAATCCCG                     | qPCR validation; PCR primer (lamprey hAT-Tip100)  |
| #274-DNA-2r        | CAAATTTTGCTTAGGGCCCC                     | qPCR validation; PCR primer (lamprey hAT-Tip100)  |
| #274-DNA-3f        | GCAATTGCAAGGGTCGCTTA                     | qPCR validation; PCR primer (lamprey hAT-Tip100)  |
| #274-DNA-3r        | TCTCCCTCGTATTGCCATGAC                    | qPCR validation; PCR primer (lamprey hAT-Tip100)  |
| #274-DNA-4f        | CGCATGGCATCCTTGTTG                       | qPCR validation; PCR primer (lamprey hAT-Tip100)  |
| #274-DNA-4r        | TGCAAGGGTCGCTTAGTGG                      | qPCR validation; PCR primer (lamprey hAT-Tip100)  |
| #274-DNA-5f        | GCAATTGCAAGGGTCGCTTA                     | qPCR validation; PCR primer (lamprey hAT-Tip100)  |
| #274-DNA-5r        | GACAGGATTCTGGAAGGCCA                     | qPCR validation; PCR primer (lamprey hAT-Tip100)  |
| #274-DNA-6f        | GCAATTGCAAGGGTCGCTTA                     | qPCR validation; PCR primer (lamprey hAT-Tip100)  |
| #274-DNA-6r        | CTGTAGATGCAGAACAGCGCA                    | qPCR validation; PCR primer (lamprey hAT-Tip100)  |
| #274-DNA-7f        | GCAATTGCAAGGGTCGCTTA                     | qPCR validation; PCR primer (lamprey hAT-Tip100)  |
| #274-DNA-7r        | CGTCGTTTATGCGTTTCTCTCA                   | qPCR validation; PCR primer (lamprey hAT-Tip100)  |
| #274-DNA-8f        | TGTGACCACGACACAAAAGCA                    | qPCR validation; PCR primer (lamprey hAT-Tip100)  |
| #274-DNA-8r        | AGCGGTCATACAGCCAGTAA                     | qPCR validation; PCR primer (lamprey hAT-Tip100)  |
| #274-DNA-9f        | ATGGAATCGTGCCCGTGAT                      | qPCR validation; PCR primer (lamprey hAT-Tip100)  |
| #274-DNA-9r        | CAATTGCAAGGGTCGCTTAGT                    | qPCR validation; PCR primer (lamprey hAT-Tip100)  |
| #274-DNA-10f       | TCGTGGGCTTCGGTTTTG                       | qPCR validation; PCR primer (lamprey hAT-Tip100)  |
| #274-DNA-10r       | GCCGGCTCTGGGAAGAA                        | qPCR validation; PCR primer (lamprey hAT-Tip100)  |
| #274-DNA-11f       | GCAATTGCAAGGGTCGCTTA                     | qPCR validation; PCR primer (lamprey hAT-Tip100)  |
| #274-DNA-11r       | ACTGTATATGCTTCTGTGTCTCTGTGTAGT           | qPCR validation; PCR primer (lamprey hAT-Tip100)  |
| #274-DNA-12f       | CCATCACGTACAACCTGCCGA                    | qPCR validation; PCR primer (lamprey hAT-Tip100)  |
| #274-DNA-12r       | AAGGTCTAGGGCCGGTCTG                      | qPCR validation; PCR primer (lamprey hAT-Tip100)  |
| CTCF_ISH_5prime-f  | AGCGTGGAGACCATGGATAC                     | ISH; PCR primer (CTCF 5' probe)                   |
| CTCF_ISH_5prime-r  | CTCCTCCTTCTCCGCTCTCT                     | ISH; PCR primer (CTCF 5' probe)                   |
| CTCF2_ISH_5prime-f | AGGTCCCAGCAAGAGCAAT                      | ISH; PCR primer (CTCF2 5' probe)                  |
| CTCF2_ISH_5prime-r | GTACCGGTGTGGGTGTTGAT                     | ISH; PCR primer (CTCF2 5' probe)                  |
| CTCF_ISH_3prime-f  | GGGGGAAGAACAGGAAGAAG                     | ISH; PCR primer (CTCF 3' probe)                   |
| CTCF_ISH_3prime-r  | AATGTAAATCGGCGATGCTC                     | ISH; PCR primer (CTCF 3' probe)                   |
| CTCF2_ISH_3prime-f | GCAGGAGCGACACATGATAG                     | ISH; PCR primer (CTCF2 3' probe)                  |
| CTCF2_ISH_3prime-r | CGCTCATTAACACCCACTG                      | ISH; PCR primer (CTCF2 3' probe)                  |

**Table S8.** Sequence IDs used for molecular phylogenetic analysis.

| Classification | Gene name                 | Species     |                                  | Accession ID        |                     | Notes                                                                                                                                |
|----------------|---------------------------|-------------|----------------------------------|---------------------|---------------------|--------------------------------------------------------------------------------------------------------------------------------------|
|                |                           | Common name | Scientific name                  | Nucleotide          | Amino acid          |                                                                                                                                      |
| CTCF           | human                     |             | <i>Homo sapiens</i>              | NM_006565.3         | NP_006556.1         |                                                                                                                                      |
| CTCF           | ostrich                   |             | <i>Struthio camelus</i>          | Sca_R014733         |                     | identified in Struthio_camelus.OM.gene.20130116.pep transcript assembly*                                                             |
| CTCF           | Chinese soft shell turtle |             | <i>Pelodiscus sinensis</i>       | ENSPSIT00000003816  | ENSPSIP00000003796  |                                                                                                                                      |
| ctcf           | green sea turtle          |             | <i>Chelonia mydas</i>            | XM_007067168.1      | EMP28837.1          |                                                                                                                                      |
|                | western clawed frog       |             | <i>Xenopus tropicalis</i>        | ENSXETT000000034066 | ENSXETP000000034066 |                                                                                                                                      |
|                | coelacanth                |             | <i>Latimeria chalumnae</i>       | ENSLACT000000011258 | ENSLACP000000011174 |                                                                                                                                      |
|                | three spined stickleback  |             | <i>Gasterosteus aculeatus</i>    | ENSGACT000000003281 | ENSGACP000000003270 |                                                                                                                                      |
|                | three spined stickleback  |             | <i>Gasterosteus aculeatus</i>    | ENSGACT000000020979 | ENSGACP000000020939 |                                                                                                                                      |
| CTCF           | elephant shark            |             | <i>Callorhynchus milii</i>       | SINCAMT00000007220  | SINCAMP000000007143 | identified in eshark_proteins.fa transcript assembly †                                                                               |
| CTCF           | small-spotted catshark    |             | <i>Scyliorhinus canicula</i>     | comp71432_c0_seq1   |                     | identified in Sca_all_tissues300.fas transcript assembly ‡                                                                           |
| CTCF           | inshore hagfish           |             | <i>Eptatretus burgeri</i>        | KX830966            |                     | see Supplementary Table S9a for nucleotide and amino acid sequences                                                                  |
| CTCF           | Arctic lamprey            |             | <i>Lethenteron camtschaticum</i> |                     |                     | sequence determined in this study                                                                                                    |
| CTCF           | sea lamprey               |             | <i>Petromyzon marinus</i>        | ENSPMAT000000004708 | ENSPMAP000000004689 |                                                                                                                                      |
| zfc(c2h2)-30   | vase tunicate             |             | <i>Ciona intestinalis</i>        | NM_001111123.1      | NP_001104593        |                                                                                                                                      |
|                | lancelet                  |             | <i>Oikopleura dioica</i>         | e_gw.69.11.1        | CBY12384            |                                                                                                                                      |
|                |                           |             | <i>Branchiostoma floridae</i>    |                     |                     | see Supplementary Table S9b for nucleotide and amino acid sequences;                                                                 |
| CTCFL          | human                     |             | <i>Homo sapiens</i>              | NM_080618.3         | NP_542185.2         | identified in Brafl1.FilteredModels1.gff <sup>§</sup> and modified incorporating GENESCAN prediction                                 |
| CTCFL          | ostrich                   |             | <i>Struthio camelus</i>          | Sca_R006826         |                     | see Supplementary Table S9c for nucleotide and amino acid sequences;                                                                 |
| CTCFL          | Chinese soft shell turtle |             | <i>Pelodiscus sinensis</i>       | ENSPSIT000000012554 | ENSPSIP000000012493 | identified in Struthio_camelus.OM.gene.20130116.pep transcript assembly* and modified incorporating GENESCAN and AUGUSTUS prediction |
|                | green sea turtle          |             | <i>Chelonia mydas</i>            | XM_007059856.1      | XP_007059918.1      |                                                                                                                                      |
| CTCF2          | Arctic lamprey            |             | <i>Lethenteron camtschaticum</i> | KX830967            |                     | sequence determined in this study                                                                                                    |
| CTCF2          | sea lamprey               |             | <i>Petromyzon marinus</i>        |                     |                     | see Supplementary Table S9d for nucleotide and amino acid sequences                                                                  |

\* <http://bigdadb.org/dataset/101013>

† <http://esharkgenome.imcb.a-star.edu.sg/>

‡ <http://datadryad.org/resource/doi:10.5061/dryad.s1f22>

§ <http://genome.jgi-psf.org/Brafl1/Brafl1.home.html>

**Table S9.** Nucleotide and deduced amino acid sequences identified in this study.

**a**

| Species                                     | Gene        | Type                        | Sequence                                                                                                                                                                                                                                                                                                                                                                                                                                                                                                                                                                                                                                                                                                                                                                                                                                                                                                                                                                                                                                                                                                                                                                                                                                                                                                                                                                                                                                                                                                                                                                                                                                                                                                                                                                                                                                                                                                                                                                                                                                                                                                                                                                                                                                                                                                                                                                                                                                                                                                                                                                                                                                                                                                                                                                                                                                                                                                                                                                                                                                                                                                                                                                                                                                                                                                                                                                                                             |
|---------------------------------------------|-------------|-----------------------------|----------------------------------------------------------------------------------------------------------------------------------------------------------------------------------------------------------------------------------------------------------------------------------------------------------------------------------------------------------------------------------------------------------------------------------------------------------------------------------------------------------------------------------------------------------------------------------------------------------------------------------------------------------------------------------------------------------------------------------------------------------------------------------------------------------------------------------------------------------------------------------------------------------------------------------------------------------------------------------------------------------------------------------------------------------------------------------------------------------------------------------------------------------------------------------------------------------------------------------------------------------------------------------------------------------------------------------------------------------------------------------------------------------------------------------------------------------------------------------------------------------------------------------------------------------------------------------------------------------------------------------------------------------------------------------------------------------------------------------------------------------------------------------------------------------------------------------------------------------------------------------------------------------------------------------------------------------------------------------------------------------------------------------------------------------------------------------------------------------------------------------------------------------------------------------------------------------------------------------------------------------------------------------------------------------------------------------------------------------------------------------------------------------------------------------------------------------------------------------------------------------------------------------------------------------------------------------------------------------------------------------------------------------------------------------------------------------------------------------------------------------------------------------------------------------------------------------------------------------------------------------------------------------------------------------------------------------------------------------------------------------------------------------------------------------------------------------------------------------------------------------------------------------------------------------------------------------------------------------------------------------------------------------------------------------------------------------------------------------------------------------------------------------------------|
| <i>Eptatretus burgeri</i> (inshore hagfish) | <i>CTCF</i> | Nucleotide coding sequence  | <p>ATGTCATAAATCCAGCCCTGTGCGGAGAGCGGACCCAAATGCAATACCCCTCTCTCCGGTAATGGCATCAGATGAA<br/>           GAAGAAACGGTGTACCATCTTCAAAGTCTTCAAACATCTTCAAAAAGTGAAGGATGCAGAAAGTGCCAGTTT<br/>           GAAGTGGTCATGACTCTTGACGACGTACCCAAACAGAAGATAGAAAATGAGGAAACGGATGTACAGGATATGAGA<br/>           ACAACACACTTCATTTGCGGTTTGCAGATGCCTGAGCAGCAGCAAGGAGAATGTGAAACTATTGATGACACTGCT<br/>           AATGCTGTTAATGAAGGCACTAGTGTCCAAGAGGGCATGGCACTTACCCTTTCAGGCGCTGCAGGCCCTCCAGCAC<br/>           GTGACTGTTGATCAAGGCCACGAGCGATGATACGCACATAATTACACTCCATCCCGTAAGCTGGAGGAGGCAACA<br/>           TCTGGGGGTGCTTCCCTCTCTCAGTGCCATCACCCCTGTGAGGTTGCCTACCGAAGATACTGGCACCACCATGCAC<br/>           CGCTTATCCAGCGATCCTGGGATATGGCGACAGCTGTAAACACTTTCAGTAGTATCGGGATCAACCCTGAAAGGC<br/>           CTGGTGGTGCATGTTGGCTCTGGAGGCCCTGTTGCTGAGGTCGTAGGCGTATCAGAGGATGGAAGTGTAAACAGTC<br/>           GGAACGGGCGACGATGGAGGCAGTAGCATTTGACTGAAGGCTTGTGACTGAGATCATTCCTATCAACCAGGCT<br/>           GGTACCTCTGAGCAGGGGCAAGGACCCATCATCAGCCACACACTCCACTTCCCATGGGGTTCAGGTGGTAAAG<br/>           GTGGGGCCCAATGGAGAGGTGAGCATGGAAGATGATGCCGAATTGGAAAACATGGTCGATGGTACACCAATGGAA<br/>           AGTCTTGAGGATCTAAAGTCCATCTCGCTGGAAGCCTGGAAGTTACTGTGCATGATGGGGTGAACATGGCAGTT<br/>           GAGTCAAGCCTTCTGTGGATGAAAGAAAGAAATCGACGAAAGGAGAGATGGAAGGAAAGGAAAGCAAGATCCT<br/>           GATTATCAGCTTCCAAGCAAGAAGCCTATCCGCAAGGGCAAGAGGAACAAGCTGCGGTACAAGGTTGAAGAAGCA<br/>           AATGAGCAAGACATATCCGTGTACGATTTTGAGGACCAGGAGGGTGAACGCTCTCGTGAGCAGTCAGGACGTCGGT<br/>           GTGGAGAAGGCCATTACGCCCAAACCGCCAAAGCCAACCTAAGATCAAAAAGAAAGGTGCCAAGAAGACGTTCCAG<br/>           TGTGAGCTCTGCAGCTATACATGTCACCGGAGGAGCTCCATTTTCAGTGTGGCCTTTCAGCTATGCTAGCCGATAC<br/>           CCTCATCGTTGCCACCTTTGTGACCGTGTCTTTCGCACCGTACGCTACTCCGCAACCATGTGAACACGCATACA<br/>           GGCACAAAGCCACACAAATGCCCGAGTGCACATGGCTTTTGTGACAAGTGGAGAGTTGGTTCGCGCACAGGAGG<br/>           TACCGCCACACGCAGGAAACCCCTTCAAGTGTCCATGTTGATGATGATGATGATGATGATGATGATGATGATGATGAT<br/>           AGGCATATCCGATCTCACACCGGAGAGGCTCCATTTTCAGTGTGGCCTTTCAGCTATGCTAGCCGATACAGCTAC<br/>           AAGCTGAAACGGCATATGCGTACACACTCGGGGAAAAGCCTTATGAATGCCATATATGCAATGCACGCTTCACC<br/>           CAGAGCGGCACCATGAAAGATGATGTGCTGCAAAAAGCAGACTGAGAATGTGCCAAAGTACCCTGCCCCACTGC<br/>           GATGCCGTCATTTGCCGCAAGAGTACCTTGGTGTCCACTGCGTAAAGCAACACTCAATTTGTGGAGCGTGAATTG<br/>           AAGTGCCGATACTGTGACCTGATATTCATGAAAGCAGTATGCCCTCATGACAGCACCAGGCTCACACAAAATGAG<br/>           AAGCGATTCAAATGTGATTGCTGTGAATACTCCTGCAAGCAGGAGGACATGGTAAATGCACAACGTTGTGCAC<br/>           ACTGGAGAGAAGCCCTTTCCTGTCATGCTTTGTGACAAGACCTTTCGACAGAAGCAGCTGCTTGACTTCCACTTC<br/>           AAGCGTTACCATGACCTAACTTATCCCTCCACAGTACGAGTGTGAGAAATGTACAAAGGCTTACCCTCCAGGAG<br/>           AACACTATGATGAGCACAGCGAAAACCTCGCATGGTGAAGTAGACGGAGAGCAGAAATGGGCGTGGTTCGACGACG<br/>           CACCGATGTGGCCGCAAGCGGAAGATGCAAGGGGCAAGCAGGATTTATCCGATTCGGATGTGGATCCTGTAAGT<br/>           GAGGATGAGGTTGAAGAGGAGGGTGAAGTGGAGGAAAGAAAGAGGAAAGAGGCTGAAGCTGTTCCACCGCTGTC<br/>           AAACGCGCCGTGGTTCGACCTCCCAAGGCCAGACCATTTGTTGAGTACACACATAAAAACGGAAGTGAAGAGGAG<br/>           CCGATCGATTTGGATTCAACCATCAACACAGTGGCAAGTGGAAATAGTGGAGATAATTCCTGTGACGGTGAAGGA<br/>           GGGTCAGACAGTATCAAGCGGTGAAGGACCGTTGCAAGCCTGAGGAAGAAGTTGAGGGAACAGAACAGGTG<br/>           GCCACTATTGTGATAGAAGCAGCAGGGAACAGTGGTGAACGGTTCAGACATCACCCAGAGATGATTTCTAAGCATG<br/>           ATGGACCAGTGA</p> |
|                                             |             | Deduced amino acid sequence | <p>MSKSSPVRADPNAI PSSPVMASDEEETVLPSSKSSNIFTKVKDAESAQFEVVMTLDDVPKQKIENEETDVQDMR<br/>           TTHFICGLQMPQQQECETIDDTANAVNEGTSVQEGMALTVQALQALQHVTVDQGTSDDTHIITLHPVSLLEAT<br/>           SGGASSLSAITLVLRLPTEDGTTMHRLLSDPGIMATAVTTSVVSGSTTEGLVVHVSGGLVAEVVGVSEDTVTV<br/>           GTDDGGSSIVTEGLVTEIIPINQAGTSEQQGPIISHTLPLPMGVQVVKVGPNGEVSMEDDAELENMVDGTPME<br/>           SLEDSKVHLAGSLEVTVDGVMMAVEIKPSVDEEESTKEESEKEKQSDPDYQLPSKKPIRKGKRNKRLRYKVEEA<br/>           NEQDISVYDFEDQEGERLVSSQDVGEKAITPKPKPKTKIKKKGAKKTFQCELSYTCPRRSLDRHMKSHHTDER<br/>           PHRCHLCDRAFRTVTLRNHNHTHTGTPHKPCPCDMAFVTSSELVRRHRYRHTHEKPFKCSMCDYASVEVSKLK<br/>           RHIRSHTGERPFQGLCSYASRDYKLRHMRTHSKEKPYECHICNARFTQSGTMMKHVLQKHTENVPKYHCPHC<br/>           DAVIARKSDLGVHLRKHQHSIVERELKCRYCDLIFHERYALMQHQRSKNEKRFKCDCEYSCKQERHMMHMRVH<br/>           TGEKPFACMLCDKTFRQQLLDFHFKRYHDPNFIPTTYECEKCHKAFTRRNTMMKHSENCDGEVDGEQNGRGRRR<br/>           HRCGRKRKMQRKQDLSDSDVDPVSEDEVEEVEVEVEVEVEVEVEVEVEVEVEVEVEVEVEVEVEVEVEVEVEVE<br/>           PIDLDSTINTVASGIVEIIPVTVQGGSDSDQGGEGTVAKPEEVEGTEQVATIVIEAAGNSGERSDITPEMILSM<br/>           MDQ</p>                                                                                                                                                                                                                                                                                                                                                                                                                                                                                                                                                                                                                                                                                                                                                                                                                                                                                                                                                                                                                                                                                                                                                                                                                                                                                                                                                                                                                                                                                                                                                                                                                                                                                                                                                                                                                                                                                                                                                                                                                                                                                                                                                                                                                                                                                          |

b

| Species                                     | Gene        | Type       | Sequence                                                                                                                                                                                                                                                                                                                                                                                                                                                                                                                                                                                                                                                                                                                                                                                                                                                                                                                                                                                                                                                                                                                                                                                                                                                                                                                                                                                                                                                                                                                                                                                                                                                                                                                                                                                                                                                                                                                                                                                                                                                                                                                                                                                                                                                                                                                                                                                                                                                                                                                                                                                                                                                                                                                                                                                                                                                                                                                                                                                                                                                                                                                                                                                                                                                                                                                                                                                                                                                                                                                                                                                                                                                                                                                                                                                                                                                                                                                              |                                                                                                                                                                                                                                                                                                                                                                                                                                                                                                                                                                                                                                                                                                                                                                                                                                                                                                                                                                                                                                                                                                                                                                                                                                                                                                      |
|---------------------------------------------|-------------|------------|---------------------------------------------------------------------------------------------------------------------------------------------------------------------------------------------------------------------------------------------------------------------------------------------------------------------------------------------------------------------------------------------------------------------------------------------------------------------------------------------------------------------------------------------------------------------------------------------------------------------------------------------------------------------------------------------------------------------------------------------------------------------------------------------------------------------------------------------------------------------------------------------------------------------------------------------------------------------------------------------------------------------------------------------------------------------------------------------------------------------------------------------------------------------------------------------------------------------------------------------------------------------------------------------------------------------------------------------------------------------------------------------------------------------------------------------------------------------------------------------------------------------------------------------------------------------------------------------------------------------------------------------------------------------------------------------------------------------------------------------------------------------------------------------------------------------------------------------------------------------------------------------------------------------------------------------------------------------------------------------------------------------------------------------------------------------------------------------------------------------------------------------------------------------------------------------------------------------------------------------------------------------------------------------------------------------------------------------------------------------------------------------------------------------------------------------------------------------------------------------------------------------------------------------------------------------------------------------------------------------------------------------------------------------------------------------------------------------------------------------------------------------------------------------------------------------------------------------------------------------------------------------------------------------------------------------------------------------------------------------------------------------------------------------------------------------------------------------------------------------------------------------------------------------------------------------------------------------------------------------------------------------------------------------------------------------------------------------------------------------------------------------------------------------------------------------------------------------------------------------------------------------------------------------------------------------------------------------------------------------------------------------------------------------------------------------------------------------------------------------------------------------------------------------------------------------------------------------------------------------------------------------------------------------------------------|------------------------------------------------------------------------------------------------------------------------------------------------------------------------------------------------------------------------------------------------------------------------------------------------------------------------------------------------------------------------------------------------------------------------------------------------------------------------------------------------------------------------------------------------------------------------------------------------------------------------------------------------------------------------------------------------------------------------------------------------------------------------------------------------------------------------------------------------------------------------------------------------------------------------------------------------------------------------------------------------------------------------------------------------------------------------------------------------------------------------------------------------------------------------------------------------------------------------------------------------------------------------------------------------------|
| <i>Branchiostoma floridae</i><br>(lancelet) | <i>CTCF</i> | Nucleotide | ATGGCGACACCTAGGCTACTGTGGAACATCCGTGCGCCTGTCCAATTGATTGAAAGAGATGGTAGAAAAGGTGGC<br>GTCTTCCTTGTCTCATCGGGGTCATCCGAAAAGATCCTGGTAGTTTACAAAACCGGAAGACACGACAAAAC<br>AAAAGTCCAATAGCACTGCCAATAACTACATCTGGCCACCCCTTCTCACCAGCTCTCTCTCCGCATTCGTGGCA<br>AATATCGCCGAAACATTCGCCATTTTGGCGGGCAATCTTGGCCGTTTCTGGCCGCTCTGGCCAGCTGGTCCCA<br>AACACCACGCTTCTGACCGGGGATTCGTTCTCCGGAGCTGGACGGCACTTTTGGACTGTTTTGGAGGAGAG<br>GAGAAAAACCAAATTAAGAAGAAAGTAGCTCGGTCACTCGCGGAGAGGGAGCTGTACCACGTGTCAAATATAAG<br>CCACTACTACAAAGTCCGCTAGTGCAGGAGTCCCGTCTCTTATACGAACATTGCTTTACATGCGCATCTGTCCAG<br>GAAGAACTGAAAGATAGTTCAGCTGAACAGGTGACAGGAGGAGTGAACAGGTGGAAGCACCCTGGTACCAGGTG<br>GAGGACGAGCTGAACAGGTGCAAGCACCAGGTGAACAGGGGGAGGCATCAGGTGAACAGGTGCCAGCCGAGAAG<br>CAGGACGACCTGGGACAGCTGCAGTCTGACCTGGAGACATCCACCAGGAGATCTCGGCAGATGTCAAGCCCTG<br>GCTGAGGGGGTGTGACGGACAGCAGGTAAGATGAGGCACCAGCAGATGCTGTCTGTGTGGAAGAAGCA<br>AAGTCTGCTGTTGAGAGCACAGGTGAAGAAACAGCTGCACCTGAAGAAATGGAACAGCACCCTGGTACCAGGTG<br>GCAGAGAAGTCTCCAGCCGAGGCACCTGCAGAGGATGAAGCACCTGATGCGGCTGGAACCTCAGCTGTAGAGAA<br>GCAGCACCTGCTGAGCAGGTGTATGTATCAGCTGAAACCACAGGGGAAGCAGCTGCACAGGAGACCCAGGGACAA<br>AACAACCACAGCAGGTTTCGATTGTCCACCACCCAGGGGGGACAGAAGTTTCATGAGTCTGTCAGCAGGAGGTT<br>GCAGCACGCTTTCAGCAGATGGCCGCGGAGAGTGGCGGTACGGGATCGGTCAGCATCATGTCGACAAAACCGGTA<br>GACGAGGGGAGGTCACGGCGAGCCAGGGGTTGGCTCGCTGCAGCCCGACAGATCACGGTGTATGACGAGCTG<br>GTTCCCGTGGACATCGCGCAGGGGGAGGGGACAGCAGCAGGGCGCACAGCCTGTGGAGAAATGGGGAGGAGGAAG<br>CCGGAAGCTGAGGACCAGGAGGGGGAGGACAGATGGAAGTGCAGCCGACCTGACTGGCAGGAGGGGGAGGAT<br>GGGGGGCGGAGTCCACCAAGGAAGGGGACATCTCGGTACAGCTTCCATGAGTGTAGACAAAACCGGATGGGAAA<br>CGCTCAAAGGGAGGAGACCGATGACCCCAAGGTCAAGGGGAGGTCACCAAAGAGATGCGTGTGTGGTGGGAAG<br>ACGTACCAGTGTACAAGTGCAGCTACACGTGTGAGAGGATGGCCTTCCCTGGAGCGCCACATGAAGGTGCACACG<br>GACGAGCGCCCTTCAAGTGTGGCACGTGCGAGCGGAGTTCGCGACCATGCGAGTCCCTCCAGAACCCACATCAAC<br>AGCCACAACGGGTCAAGGCCCAAGGACCAAGTGCACATGCGCCCATGAGCTTTGTGACAGCGGGGAGCTGTAGCGC<br>CACCGACGGTACAAGCACACGCAGGAGAAAGCCGACAAAGTGCACCATGTGCGACTATGCCAGCGTGGAGATCAGC<br>AAGCTCAAGCGCCACATGAGGTCTCACACCGGAGAGCGACCTTCCAATGTGGCATGTGTAGCTATGCCAGTCTCT<br>GACAGTACAAGCTGAAGCGCCACATGCGCACCATACAGGCGAGAAGCCATACAGTGTCCGTGTGTCTCGCC<br>ACCTTTACCCAGAGTGGCAGCCTCAAAATGACATGCGCGTCAATTTGGGAACCGGCCCTTTTACGCTCTCGAC<br>ATCTGTGGCAGCGGCTGACGCGAAGAGCGACCTGAAGTCTCATGTCCGCAAACTCCACACCGGCGACAGCTG<br>CTCACCTGCAAGTACTGTGACTCAGCCTTCCCGGACAAGTACAACCTTACCAAACATCTCAAAAACACACCCAGGT<br>AGTACAACCTTACCAAACATCTCAAAAACACACCAAGTTCAGTACAACCTTACCAAACATCTCAAAAACACACCCAGTT<br>CAGTACAACCTTACCAAACATCTCAAAAACACACCAAGTTCAGTACAACCTTACCAAACATCTCAAAAACACACCTTAC<br>CAAACATCTCAAAAACACACCCAGGTCAGTACAACCTTACCAAACATCTCAAAAACACACCCAGGTCAGTACAACCTTAC<br>CCAAAACATCTCAAAAACACACCCAGGTCAGTACAACCTTACCAAACATCTCAAAAACACACCCAGGTCAGTACAACCTT<br>ACCAAACATCTCAAAAACACACCCAGGTCAGTACAACCTTACCAAACATCTCAAAAACACACCCAGGTCAGTACAACCTT<br>TACCAAACATCTCAAAAACACACCCAGGTCAGTACAACCTTACCAAACATCTCAAAAACACACCCAGGTCAGTACAACCTT<br>CAACACACCTGGTTTGTACAACCTTATCGAACATCTCAGTACAACCTCAGCAAAACATATTACAACACACCTGGTT<br>TGTAACAACCTTATCGAACATCTCAGTACAACCTCAGCAAAACATATTACAACACACCTGGGAGAGAAGCGCTTC<br>AGGTGTGAGGACTGTAAGTGTGATGATGATTCATGTCGAGGAGGAGGACCTGATCAACCAAGCAGCTGCCAGGCGATGGACG<br>AAACCTTCTGCTGTGTGAGTGTGACACACCTTCCGCGCAGGAGCAGCTGCTCAAGCAGCACATAAAGGTGCAC<br>CACAGCCTGGCTACACCCTCCCGCTACGCTGCACCAACTGCGACAAGTCCCTTACCCGCAAGGGGACCTG<br>CGCAAGCAGTGGAGCAGGCGCACGACCCAGCGCCGCTGCTGCCCGCATGATGGGGCGCGGACAGGGGGCTCG<br>CGGTACACGACCGCTGGACAGTATGATTCATGTCGAGGAGGAGGACCTGATCAACCAAGCAGCTGCCAGGCGATGGACG<br>ATCGAGGACAGCAGATGGACGGAGAGGCATGGAGGAGCGGAAATGGAGCCGAGGATGAAGACTCAGATGCC<br>GACTACAGGCCAGGAGACGACATCGACGAAACGCCCAAGCGCAAGCCCAAGACCCCGCTAAGAGGAAAGCCAAC<br>ACGCCAAGTCCACGCCCAGAGGAAACGACAGAAGAAGAAAGTAAAGTCTGAGGAGGAGGAGGCTGAGGAG<br>GAACCGGAGGGGAGGAGATGGGAGAGGCTCCTCCTGCCACTAAGGAAGGAGAACAGCCAGCAGAGGAAAGCT<br>GAAGCTGAAGCAGCTGTGGAGGATCAGCAACCAGCTGAGGCTGAGGCTGAAGCTGAGGCTGAAACTGAAGCTACA<br>GAGCAGACCTAG |                                                                                                                                                                                                                                                                                                                                                                                                                                                                                                                                                                                                                                                                                                                                                                                                                                                                                                                                                                                                                                                                                                                                                                                                                                                                                                      |
|                                             |             | Deduced    | amino acid                                                                                                                                                                                                                                                                                                                                                                                                                                                                                                                                                                                                                                                                                                                                                                                                                                                                                                                                                                                                                                                                                                                                                                                                                                                                                                                                                                                                                                                                                                                                                                                                                                                                                                                                                                                                                                                                                                                                                                                                                                                                                                                                                                                                                                                                                                                                                                                                                                                                                                                                                                                                                                                                                                                                                                                                                                                                                                                                                                                                                                                                                                                                                                                                                                                                                                                                                                                                                                                                                                                                                                                                                                                                                                                                                                                                                                                                                                                            | MTPRLLWNIRAPVQLIERDGRKGGVFLVSSGVIRKDPGSFTKRKRQRQNKSPIALPITTSGHPLFLTASLSAFVA<br>NIAEHSPFWAAIFAVSARLCLGLPNTLLTGGFVLRSLDGTATCFGGEBKQIKKKVARSLAERELVPRVKYK<br>PLLQSPVLRSPVSYTNIALHAHPVQEETEDSSAEQVQVEAVEQVEAPGDQVEAAAEQVQAPGEQGEASGEQVPAEK<br>QDDLGLQLQSYLETFFHQEISADVKPLAEGGADGQGGKDEAPADAVPAVEEAAAPVESTGEEETAPEEMETTQGVVE<br>AEKSPAEPAEDEAPDAAGTSAVEEAPAEQVYVAETTGEEAAQETQGGQQPQVRIVTTQGGTEVHEVVSEEV<br>AAQLQMAAESGGTGSVSIIVQSGSDEGQVTASQAVGSLQPGQITVMYELVPVDIAQGEQQQAAQPVENGEVEE<br>PEAEDQEGEEPDSAADPDWQEGEDGGAESTKEGDISVYDFDELDPDGKRSKGGDAMTPKVKGRSPKMRVGGK<br>TYQCYKCDYTCQRMAFLERHMKVHTDERPFKCGTCEREFRTMQLQNHINSHNGVKNPHKCDQC PMSFVTS GELMR<br>HRRYKHTHEKPHKCTMCDYASVEISKLKRHMRSHTERPFQCGMCSYASPD SYKLRHMRHTHTGEKPYECSVCLA<br>TFTQSGSLKMHMQRHLGTAPSVCIDICGTALTRKSDLKSHVRLHTGDKLLTCKYCD SAFPDKYNLTKHLKTHQV<br>STTLPNISKHTRSVPYQTSQNTFPQYNLTKHLKTHQVSTTLPNISVQPYQTSQNTPGQYNLTKHLKTHQVSTTL<br>PNISKHTRSVPYQTSQNTFPQYNLTKHLKTHQVSTTLPNISKHTRSVPYQTSQNTPGQYNLTKHLSTSTNIL<br>QHTWFVQPYRTSYNLSKHITTHLVCTTSLNISQYNLSKHITTHLGEKRFRCEDCNYCCTQERHLINHKRCHTGE<br>KPFVVCQDHTFRQEQLLKHQIKVHHTPGYTPPRYACTNCDKSFTRKGNLRKHVEQAHDP SAVLPAMMGRGSRGS<br>RLHDRLDDDDSMSEGEHEFEQAMDEIEAQQMDGEGMEEREMEPQDEDS DADYRPGDDIDETPKRKPKT PPKRKAN<br>TPKSTPQKRKRQKKIKSEEEAEPEGEEMGEAPPPATKEGEQPAEEAEAEAAVEDQQPAEEAEAEAEATEAT<br>EQT |



c

| Species                              | Gene         | Type               | Sequence                                                                                                                                                                                                                                                                                                                                                                                                                                                                                                                                                                                                                                                                                                                                                                                                                                                                                                                                                                                                                                                                                                                                                                                                                                                                                                                                                                                                                                                                                                                                                                                                                                                                                                                                                       |
|--------------------------------------|--------------|--------------------|----------------------------------------------------------------------------------------------------------------------------------------------------------------------------------------------------------------------------------------------------------------------------------------------------------------------------------------------------------------------------------------------------------------------------------------------------------------------------------------------------------------------------------------------------------------------------------------------------------------------------------------------------------------------------------------------------------------------------------------------------------------------------------------------------------------------------------------------------------------------------------------------------------------------------------------------------------------------------------------------------------------------------------------------------------------------------------------------------------------------------------------------------------------------------------------------------------------------------------------------------------------------------------------------------------------------------------------------------------------------------------------------------------------------------------------------------------------------------------------------------------------------------------------------------------------------------------------------------------------------------------------------------------------------------------------------------------------------------------------------------------------|
| <i>Struthio camelus</i><br>(ostrich) | <i>CTCF1</i> | Nucleotide         | ATGCAGAAATGTTGACTTGGCAGAAAGAAATGGACCCCTTCAGAGGAGTAGGCGTGGTCTGAGCGTACAGGAAGGT<br>GTCTGCGCGTTTTACGACTTGGAGTTGATGCAGATTAGTATTTTTGCAAGAAAAAGCGCAAGCGAAGAATTTAGAA<br>AGCAAGTCAGCAGAGAGACCGCTAGACATGCTACTGATTGAGCTTGACAGAGATAAAGATGTCATTGCACCTTGAA<br>AATAAGGTCCAGCCACTAACCCCATCTGAAGAAGGAGGAGAAAAAGAACTTTTCAGTGTAGGGAAAGCAAAGAGC<br>CGGACTGTAAAGCCAGTGGTGTATTGTTGGTTTTCATGCAATAAATAAAGAACAGGAATACGTGACTCCGTCA<br>GAGCAAGCTGTAAACAAAAATCCCAAGTCTCAAAAATCTCAGAAAGGTAAGAAAGCAGTTTTTCAGCTGTGATTTG<br>TGACATTCACCTCACTCAGAATAATCAAGTCTTAACCGTCACATGAAAACCCATTCGGATGAAAAACCTCATGTG<br>TGTACCTCTGCCTTAAGGCTTTTCGTACAGCTACTCTCCTGCCAAACCATGTGAATGCACATACAGGGACGAGA<br>CCGTATAAATGCAGTGACTGTGATATGGCATTGTGACCAGTGGTGAGCTTGCGCGACACAGACGTTACAAGCAT<br>ACTTTAGAAAAACCTTCAAGTGTCAATATGTAATAATCTTAGCGTAGAAGCAAGCAAACCTGAAGCGACACATA<br>CGCTCGCATACAGGAGAGCGTCTTACGCCTGTTACCTTTGCAGTTATGCTAGCAAAGATACATATAAACTGAAA<br>AGACACATGATAACTCATTCAGGTGAAAAACCATATGAATGTTATGTTTTGCCAGGCCAGATTCACCTCAAAGTGGT<br>ACCATGAAAATCCATATATGCAAAAGCATGGTGAAGATGTGCCAAAATACCAGTGTCCACATTGTAATACATTT<br>ATTGCACGAAAAAGTGAAGTGGGTGTCCACTTGCAGAAATCTGCATTCTTACATGGCAGTGGCAATTAATGTCAGT<br>TACTGTGAAGCTGTTTTTCATGAGCGCTATGCTCTTACTCAGCACAAGAAGACTCACAAAAATGAAAAAGATTTC<br>AGATGTGATCAGTGACGCTATGCATGCAAGCAGGAGCGACACTTAATTTACATATAAACCCCACTGCTGGTGA<br>AAGCCCTTCACTTGCTTGTGCTGCAGCAAAGCTTCAACGAAAGCAGCTTCTCACTGTTCACTTTAGGAAGCAC<br>CACGATTCCAATTTCAAACCTACAGTTTTATGAATGCCCTAAATGTGGTAAGGGCTATTTACGCTGGAGTAAATG<br>CATAAGCATGCTGAAAATTGTGGACTGGCGAGGGCAAAGCTGTTGCATCCAGAAAAAGCAAGGGCAGAAAAAG<br>AAAAAACGTGAGAACCTAAAGCATGTTAAGCAAGAAGTTGGCCCGGAATCCTTCCAAGATATCTGCACCTGTGAG<br>CATGAACGTTGTGCCAGTGAATTTCTCTGTTTTAGATGGAATAGAAGCAGGAGCTTCGAGCGAACAGAAAAACA<br>GAAATGACATGTGAAATGCTTCTCAACATGATGGACAAATAA |
|                                      |              | coding<br>sequence | MQNVDLAERNPFRGVGVVLSVQEGVCAFYDLELMQISILQEKAQAKNLESKSAERPLDMLLIELDRDKDVI<br>ALE<br>NKVQPLTPSEEGEKEKELFSVREAKSRDCKASGDLVSCNKYKEQYVTPSEQAVTKNPKSQKSKQKKA<br>VFSDDL<br>CTFTSLRISLNRHMKTHSDEKPHVCHLCLKAFRTATLLRNHVNAHTGTRPYKSCDCDMAFVTS<br>GELARHRRYKH<br>TLEKPFKCSICKYSSVEASKLKRHIRSHTGERPYACYLCSYASKDITYKLRHMITHSGEKPYE<br>CYVCARFTQSG<br>TMKIHILQKHGENVPKYQCPHCNFTFIARKSDLGVHLRNLHYSYMAVAIKCSYCEAVFHER<br>YALTOHKKTHKNEKRF<br>RCDQCSYACKQERHLIVHKRTHTEKPFCTCLCCSKSFQRKQLLTVHFRKHHSNFKPTVYEC<br>PKCGKGYLRWSNM<br>HKHAENCLARAKAVASRKRKSKGKKKRENLKHVKQEVGPESFQDICTVNHERCASEIVP<br>VLDGIEAGASSEQKT<br>EMTCEMLLNMMDK                                                                                                                                                                                                                                                                                                                                                                                                                                                                                                                                                                                                                                                                                                                                                                                                                                                                                                                                                                                                                                                                                                                                                  |

d

| Species                                    | Gene         | Type               | Sequence                                                                                                                                                                                                                                                                                                                                                                                                                                                                                                                                                                                                                                                                                                                                                                                                                                                                                                                                                                                                                                               |
|--------------------------------------------|--------------|--------------------|--------------------------------------------------------------------------------------------------------------------------------------------------------------------------------------------------------------------------------------------------------------------------------------------------------------------------------------------------------------------------------------------------------------------------------------------------------------------------------------------------------------------------------------------------------------------------------------------------------------------------------------------------------------------------------------------------------------------------------------------------------------------------------------------------------------------------------------------------------------------------------------------------------------------------------------------------------------------------------------------------------------------------------------------------------|
| <i>Petromyzon marinus</i><br>(sea lamprey) | <i>CTCF2</i> | Nucleotide         | GGGAGGCGCGGTGGAGTAGCGGGCAGGAGGAGGCGGTGGAGTAGGAAGGAACCTAGCCACTGCTGAGCGCAGT<br>CACCGCTGCCACCTCTGTGACCGGATCTTCGGCTCCGTCACGCTCCTACGCAACCACATCAACACCCACACCGGC<br>ACGAAGCCCGCACCAGTGCCTCGAGTGTGCGATGGCGTTTTGTAACCAAGGGGGAGTTGGTGGCGCACGGCCGCTAC<br>GTCCACACCGGGCAGAAAGCCCTTCAAGTGTCTGCATGCGAGTACACAAGTGTGGAGGTGAGCATGATGAAACGC<br>CACATGAGGTGCGCATACTGGCGAGCGTCCGTTCCAGTGCAGCGCGTGCAGCTACGCTAGCAAGGACGCCTACAGG<br>CTCAAGCGGCACATGAGGACGCACTCCGGGGAGAAGCCGTACGAGTGCCTGGTGTGCCGGCGCGGTTCACCCAG<br>AAGAGCTCCATGAAATCCCACGTGCAGCAGAAGCACACGGAGGAGGGGGCCACTCCACGCTTCTCTTGCCCGCAC<br>TGCAGCGTGTACAGCACGCAAGAGTGACCTGGGCGTGCATCTGCAGCAAGCAACATGCGCTGGTGCCTGTGGC<br>CTGCGCTGCCGCTACTGCACGGCCACCTTCCACGAGCACTTTGCCCTGATGCAGCACACGCGCTGCCACCACCAC<br>GAGAAGCACTTCAAGTGCACCGCTGCCAGTACGCTGTACACAGGAGCGACACATGATAGCTCACAAGCGATCT<br>CACACGGCCGGGAAGCCGTTGACTCGGCCCACTCCCCATCGACGATGAGGAGGCAAGCGGGGAGGAGGAGGAG<br>GAGGAAGAGCGGTGGTGAAGGTGAAAGTCCGAGGAAGAAGAGCAGAGTACAGGAGGAGTGGAAAGATTCCAAACCA<br>CCCTCTGCTAAGCGACGTCGCCGCCGCCATCCAAAGCCAGACGAGGCGCACCGGCAAAGTCCAAAGAATAA |
|                                            |              | coding<br>sequence | GRRGGVAGRRGGGVGRNSATAERSHRCHLCDRIFGSVTLRLNHINTHTGKPHQCLECAMAFVTKGELVRHGRY<br>VHTGEKPFKCSACEYTSVEVSMKRHRMSHTGERPFQCSACSASYASKDAYRLKRHRMTHS<br>GEKPYECPVCRARFTQ<br>KSSMKSHVQQKHTTEEGATPRFSCPHCDAVTARKSDLVHLRKHQHALVRRGLRCRYCTATFHEHFALM<br>QHQRCHHH<br>EKHFKCDRCQYACTQERHMIHKRSHTAGKPFDSAQPLIDDEEARREEEEEEEAVVKVVEE<br>EESQSEVEDSKP<br>PSAKRRPAPPKARRRPAKSKE                                                                                                                                                                                                                                                                                                                                                                                                                                                                                                                                                                                                                                                                                             |

## References

1. Sadaie, M., Shinmyozu, K. & Nakayama, J. A conserved SET domain methyltransferase, Set11, modifies ribosomal protein Rpl12 in fission yeast. *J. Biol. Chem.* **283**, 7185-95 (2008).
2. Mehta, T.K. *et al.* Evidence for at least six Hox clusters in the Japanese lamprey (*Lethenteron japonicum*). *Proc. Natl. Acad. Sci. U. S. A.* **110**, 16044-9 (2013).
3. Simao, F.A., Waterhouse, R.M., Ioannidis, P., Kriventseva, E.V. & Zdobnov, E.M. BUSCO: assessing genome assembly and annotation completeness with single-copy orthologs. *Bioinformatics* **31**, 3210-2 (2015).
4. Altschul, S.F., Gish, W., Miller, W., Myers, E.W. & Lipman, D.J. Basic local alignment search tool. *J. Mol. Biol.* **215**, 403-10 (1990).
5. Stanke, M., Steinkamp, R., Waack, S. & Morgenstern, B. AUGUSTUS: a web server for gene finding in eukaryotes. *Nucleic Acids Res.* **32**, W309-12 (2004).
6. Kim, D. *et al.* TopHat2: accurate alignment of transcriptomes in the presence of insertions, deletions and gene fusions. *Genome Biol.* **14**, R36 (2013).
7. Langmead, B. & Salzberg, S.L. Fast gapped-read alignment with Bowtie 2. *Nat. Methods* **9**, 357-9 (2012).
8. Slater, G.S. & Birney, E. Automated generation of heuristics for biological sequence comparison. *BMC Bioinform.* **6**, 31 (2005).
9. Smith, J.J. *et al.* Sequencing of the sea lamprey (*Petromyzon marinus*) genome provides insights into vertebrate evolution. *Nat. Genet.* **45**, 415-21, 421e1-2 (2013).
10. Smit, A.F.A. & Hubley, R. RepeatModeler Open-1.0. [<http://www.repeatmasker.org>]. (2008-2015).
11. Smit, A.F.A., Hubley, R. & Green, P. RepeatMasker Open-4.0. [<http://www.repeatmasker.org>]. (2013-2015).
12. Trapnell, C. *et al.* Differential gene and transcript expression analysis of RNA-seq experiments with TopHat and Cufflinks. *Nat. Protoc.* **7**, 562-578 (2012).
13. Grabherr, M.G. *et al.* Full-length transcriptome assembly from RNA-Seq data without a reference genome. *Nat. Biotechnol.* **29**, 644-52 (2011).
14. Haas, B.J. *et al.* Improving the *Arabidopsis* genome annotation using maximal transcript alignment assemblies. *Nucleic Acids Res.* **31**, 5654-5666 (2003).
15. Haas, B.J. *et al.* De novo transcript sequence reconstruction from RNA-seq using the Trinity platform for reference generation and analysis. *Nat. Protoc.* **8**, 1494-1512 (2013).
16. Pearson, W.R. & Lipman, D.J. Improved tools for biological sequence comparison. *Proc. Natl. Acad. Sci. U. S. A.* **85**, 2444-8 (1988).
17. Roberts, A. & Pachter, L. Streaming fragment assignment for real-time analysis of sequencing experiments. *Nat. Methods* **10**, 71-73 (2013).
18. Langmead, B., Trapnell, C., Pop, M. & Salzberg, S.L. Ultrafast and memory-efficient alignment

- of short DNA sequences to the human genome. *Genome Biol.* **10**, R25 (2009).
19. Zhang, Y. *et al.* Model-based analysis of ChIP-Seq (MACS). *Genome Biol.* **9**, R137 (2008).
  20. Grant, C.E., Bailey, T.L. & Noble, W.S. FIMO: scanning for occurrences of a given motif. *Bioinformatics* **27**, 1017-8 (2011).
  21. Lee, T.I., Johnstone, S.E. & Young, R.A. Chromatin immunoprecipitation and microarray-based analysis of protein location. *Nat. Protoc.* **1**, 729-48 (2006).
